# Supplementary material for: Exceptionally Long Covalent CC Bonds—A Local Vibrational Mode Study
Source: PubMed Central journal article supplement (PMC7916873; doi:10.3390/molecules26040950), 2021-02-11
Supplement: molecules-26-00950-s001.pdf [file molecules-26-00950-s001.pdf]

**Supporting Material for:**

**Exceptionally Long CC Covalent Bonds - A Local Vibrational Mode Study**

Alexis A. A. Delgado,<sup>1</sup> Alan Humason,<sup>1</sup> Kalescky,<sup>1</sup> and Elfi Kraka<sup>1, a)</sup>

*Department of Chemistry, Computational and Theoretical Chemistry Group (CATCO),  
Southern Methodist University, 3215 Daniel Avenue, Dallas, TX 75275-0314,  
United States*

(Dated: 19 February 2021)

---

<sup>a)</sup>Electronic mail: ekraka@gmail.com

---

## I. NOTES

The compilation of experimental bond lengths summarized in Table S1, is from an extensive literature search of the target compounds.<sup>1-42</sup> This data includes electron diffraction, x-ray diffraction, microwave spectroscopy and infrared spectroscopy methods. The parameters reported in the literature are obtained by different techniques, at different temperatures and in different matrices, all of which effects the actual values. Note that when multiple values are available, the experimental values vary by an average of 0.034 Å.

To simplify the on-going analysis, the most accurate bond lengths are selected from among the literature values by the following criteria:

- Gas phase electron diffraction experiments, yielding  $r_a$  values, are considered most accurate, because they are taken in the gas phase, making them more comparable to the theoretical results. These results are also more accurate than x-ray diffraction experiments, because the wavelengths of accelerated electrons are shorter than the wavelengths of x-rays, further increasing the accuracy.<sup>43</sup> In some experiments, the electron diffraction results are combined with microwave spectroscopy rotational constants, to obtain  $r_g$  values of improved accuracy.
- X-ray diffraction experiments generally have the limitations that 1) structures are determined on solid crystals, and therefore are subject to packing effects, and 2) hydrogen atoms, which have no core electrons, cannot be accurately located. For this study of C-C bond lengths, the approximate hydrogen locations are not a concern, but the other considerations make these values less reliable than electron diffraction.
- Microwave and infrared spectroscopy experiments, yielding  $r_m$ ,  $r_o$  and  $r_s$  data, depend upon comparison of rotational constants for multiple isotopomers. These methods have the limitations that 1) they are dependent upon the availability of the isotopomers, and 2) the calculations are based on initial assumed geometries. These results are considered least accurate, and are used when results from the other techniques are unavailable.

Although bond dissociation energies (BDE's) are often cited as bond strength descriptors, molecular energies at 0K cannot be measured. Experimentally, only bond dissociation enthalpies

(BDH's) are accessible. Therefore, calculated (G4) values of BDH at 298K are used for comparison with reported experimental values. Several compilations of bond dissociation enthalpies are available,<sup>44-49</sup> and are compiled in Table S2. Here again, the available data are from various methods, and are not comparable. Where multiple values are available, the BDH's vary by an average of 4 kcal/mol. We make no differentiation of data quality here. IUPAC names for all of the target compounds are included in Table S3, to remove any ambiguity concerning structure. Calculated bond distances  $R(CC)$ , local mode force constants  $k^a(CC)$ , energy densities, and natural bond orbital (NBO) charges in electrons for the CC bonds of fluorinated and chlorinated ethane at different levels of theory are provided in Table S4. Figure S1 features a NBO charge schematic for molecules **1-53** calculated at the  $\omega$ B97X-D/aug-cc-pVTZ level of theory. Figure S2 demonstrates the relationship between calculated bond dissociation enthalpies  $BDH_{calc}$  and calculated C-C bond lengths.  $BDH_{calc}$  values were obtained with the composite G4 method and  $R(C-C)$  values computed at the  $\omega$ B97X-D/aug-cc-pVTZ level of theory. Figure S3 shows the correlation between the local stretching force constant  $k^a$  and electron density  $\rho_b$  calculated at the  $\omega$ B97X-D/aug-cc-pVTZ level of theory.

### Group I

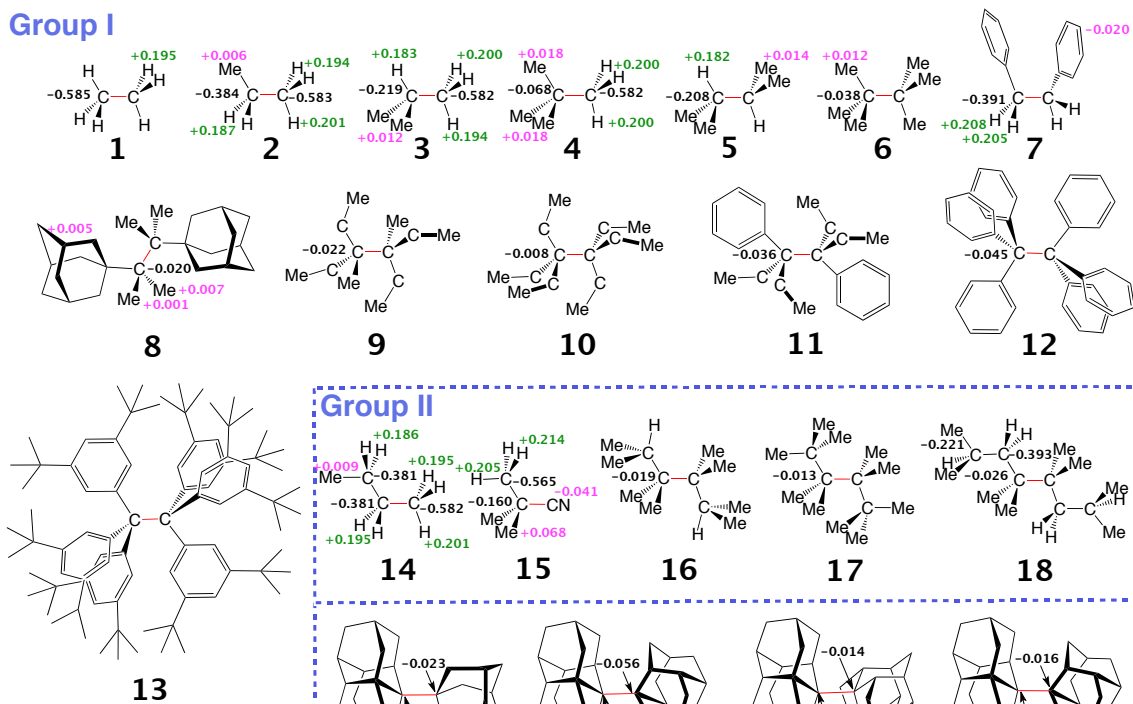

### Group II

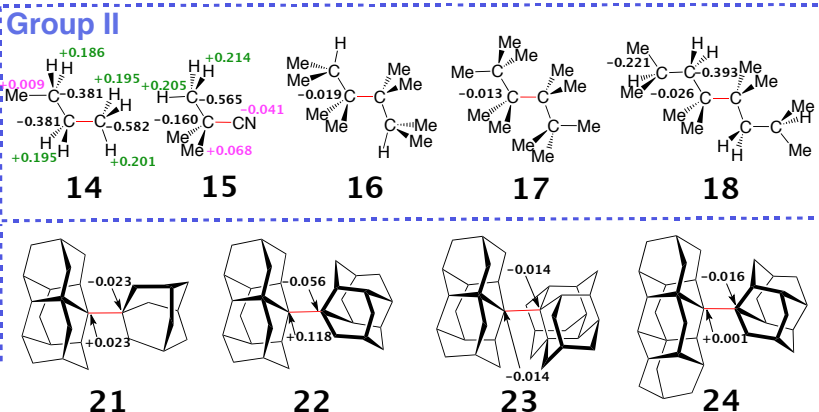

### Group III

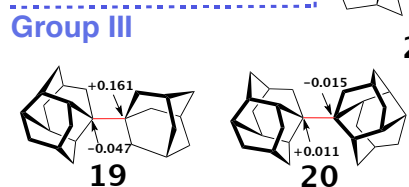

### Group IV

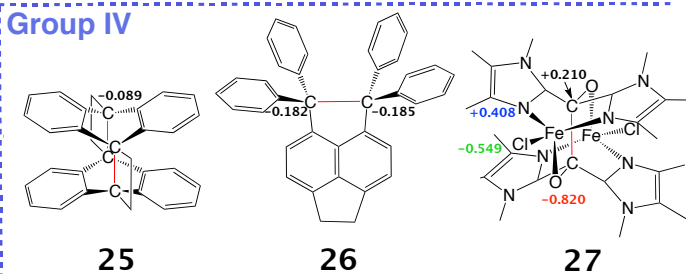

### Group V

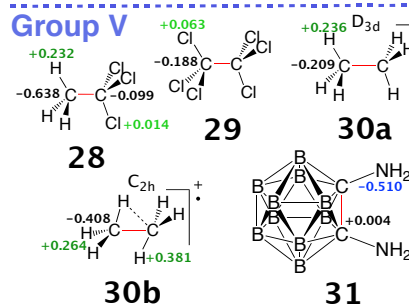

### Group VI

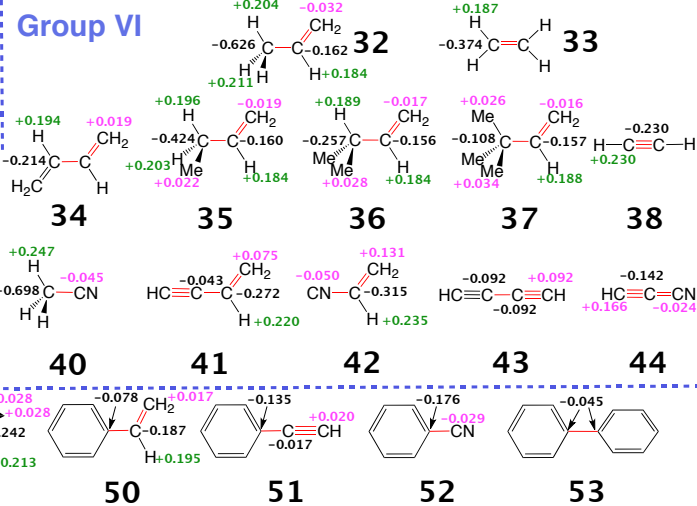

### Group VII

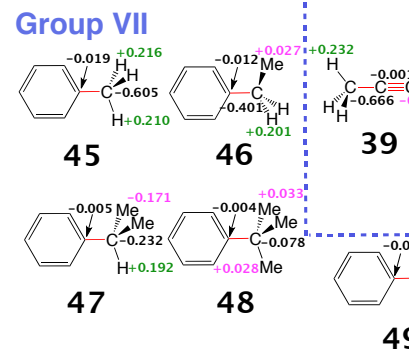

FIG. S1. Natural bond orbital (NBO) charges in e for molecules 1-53 calculated at the  $\omega$ B97X-D/aug-cc-pVTZ level of theory.

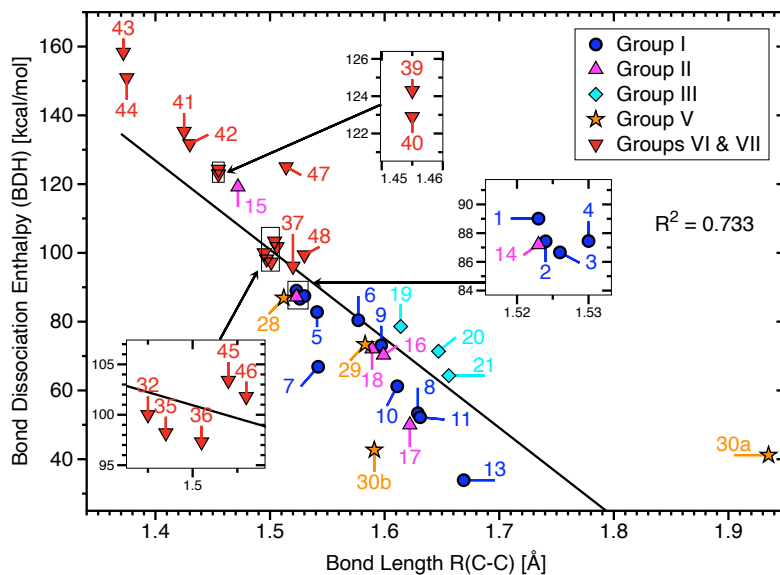

FIG. S2. Correlation between calculated bond dissociation enthalpies  $BDH_{calc}$  and calculated C–C bond lengths. BDH values calculated with the composite G4 method and R(C–C) values at the  $\omega$ B97X-D/aug-cc-pVTZ level of theory. The black line denotes a linear relationship.

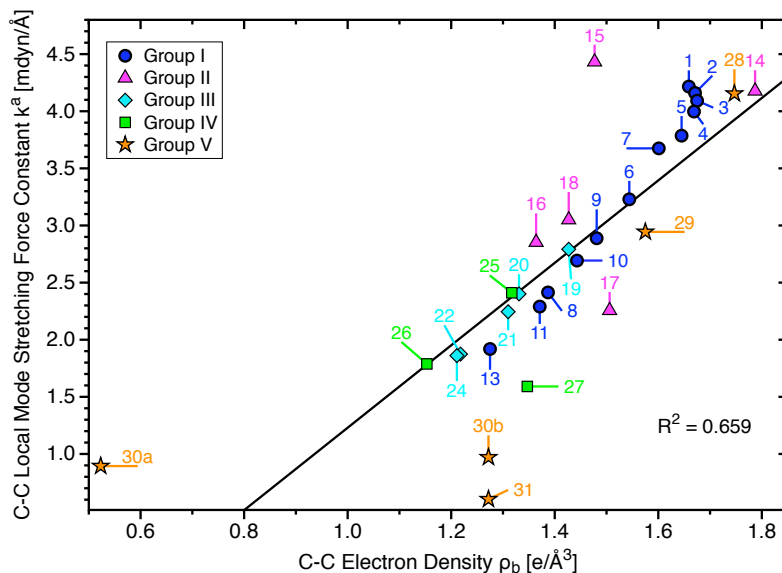

FIG. S3. Correlation between the local stretching force constant  $k^a$  and electron density  $\rho_b$  calculated at the  $\omega$ B97X-D/aug-cc-pVTZ level of theory. The black line denotes a linear relationship.

TABLE S1. Experimental Carbon-Carbon Bond Lengths  $R$  [Å]

| No. | Bond ID                                                       | Electron<br>Diffraction          | X-Ray<br>Diffraction           | Microwave<br>Spectroscopy      | Infrared<br>Spectroscopy   | $\Delta R_{exp}^d$ |
|-----|---------------------------------------------------------------|----------------------------------|--------------------------------|--------------------------------|----------------------------|--------------------|
| 1   | Me-Me                                                         | <b>1.536</b> <sup>43</sup>       | 1.536 <sup>32</sup>            |                                | 1.534 <sup>43</sup>        | 0.002              |
| 2   | Me-Et                                                         |                                  |                                | <b>1.528</b> <sup>38</sup>     |                            |                    |
| 3   | iPr-Me                                                        | <b>1.535</b> (1) <sup>2</sup>    |                                | 1.525 (1) <sup>3</sup>         |                            | 0.01               |
| 4   | tBu-Me                                                        | <b>1.539</b> <sup>43</sup>       | 1.546(2) <sup>11</sup>         |                                |                            | 0.007              |
| 5   | (iPr) <sub>2</sub>                                            | <b>1.544</b> <sup>39</sup>       |                                |                                |                            |                    |
| 6   | (tBu) <sub>2</sub>                                            | <b>1.582</b> <sup>39</sup>       |                                |                                |                            |                    |
| 7   | (PhCH <sub>2</sub> ) <sub>2</sub>                             | <b>1.55</b> (26) <sup>25</sup>   | 1.529 (3) <sup>25</sup>        |                                |                            |                    |
| 8   | (AdMe <sub>2</sub> C) <sub>2</sub>                            | <b>1.677</b> (30) <sup>40</sup>  | 1.58 <sup>48</sup>             |                                |                            | 0.051              |
| 9   | (Et <sub>2</sub> MeC) <sub>2</sub>                            | <b>1.601</b> <sup>48</sup>       | 1.639 <sup>26</sup>            |                                |                            | 0.038              |
| 10  | (Et <sub>3</sub> C) <sub>2</sub>                              | 1.635 <sup>48</sup>              |                                |                                |                            |                    |
| 11  | (PhEt <sub>2</sub> C) <sub>2</sub>                            |                                  | <b>1.635</b> <sup>27</sup>     |                                |                            |                    |
| 12  | (Ph <sub>3</sub> C) <sub>2</sub>                              |                                  |                                |                                |                            |                    |
| 13  | hexakis                                                       |                                  | <b>1.67</b> (3) <sup>42</sup>  |                                |                            |                    |
| 14  | Et-Et                                                         | <b>1.539</b> (3) <sup>43</sup>   |                                |                                |                            |                    |
| 15  | tBu-C≡N                                                       | <b>1.46</b> (2) <sup>14</sup>    |                                |                                |                            |                    |
| 16  | (iPrMe <sub>2</sub> C) <sub>2</sub>                           | 1.601 <sup>48</sup>              |                                |                                |                            |                    |
| 17  | (tBuMe <sub>2</sub> C) <sub>2</sub>                           | <b>1.63</b> <sup>40</sup>        |                                |                                |                            |                    |
| 18  | (iBuMe <sub>2</sub> C) <sub>2</sub>                           | 1.606 <sup>48</sup>              |                                |                                |                            |                    |
| 19  | diAd-Ad                                                       |                                  | <b>1.66</b> <sup>41</sup>      |                                |                            |                    |
| 20  | diAd-diAd                                                     |                                  | <b>1.647</b> <sup>40</sup>     |                                |                            |                    |
| 21  | triAd-Ad                                                      |                                  | <b>1.659</b> <sup>40</sup>     |                                |                            |                    |
| 22  | triAd-diAd                                                    |                                  | <b>1.704</b> <sup>40</sup>     |                                |                            |                    |
| 23  | triAd-triAd                                                   |                                  |                                |                                |                            |                    |
| 24  | tetraAd-diAd                                                  |                                  | <b>1.707</b> <sup>40</sup>     |                                |                            |                    |
| 25  | bianthracene                                                  | <b>1.64</b> (1) <sup>28</sup>    | 1.653 <sup>29</sup>            |                                |                            |                    |
|     |                                                               |                                  | 1.648 (3) <sup>29</sup>        |                                |                            |                    |
|     |                                                               |                                  | 1.77 <sup>30</sup>             |                                |                            | 0.13               |
| 26  | tetra-Ph-acenaphthene                                         |                                  | <b>1.754</b> (2) <sup>31</sup> |                                |                            |                    |
| 28  | H <sub>3</sub> C-CCl <sub>3</sub>                             |                                  |                                | <b>1.516</b> (4) <sup>12</sup> |                            |                    |
| 29  | (Cl <sub>3</sub> C) <sub>2</sub>                              | <b>1.564</b> (14) <sup>13</sup>  |                                |                                |                            |                    |
| 30  | CH <sub>3</sub> -CH <sub>3</sub> <sup>+</sup> D <sub>3d</sub> |                                  |                                |                                |                            |                    |
| 31  | CH <sub>3</sub> -CH <sub>3</sub> <sup>+</sup> C <sub>2h</sub> |                                  |                                |                                |                            |                    |
| 32  | Me-CH=CH <sub>2</sub>                                         |                                  |                                | <b>1.501</b> <sup>38</sup>     |                            |                    |
| 33  | H <sub>2</sub> C=CH <sub>2</sub>                              |                                  | <b>1.339</b> <sup>32</sup>     |                                |                            |                    |
| 34  | (CH <sub>2</sub> =CH) <sub>2</sub>                            | <b>1.467</b> <sup>5</sup>        |                                |                                |                            |                    |
|     |                                                               | 1.486 <sup>43</sup>              |                                |                                | 1.485 <sup>43</sup>        | 0.018              |
| 35  | Et-CH=CH <sub>2</sub>                                         | <b>1.502</b> <sup>4</sup>        |                                |                                | <b>1.500</b> <sup>10</sup> |                    |
| 36  | iPr-CH=CH <sub>2</sub>                                        |                                  |                                |                                |                            |                    |
| 37  | tBu-CH=CH <sub>2</sub>                                        | <b>1.522</b> <sup>48</sup>       |                                |                                |                            |                    |
| 38  | HC≡CH                                                         |                                  | <b>1.208</b> <sup>32</sup>     |                                |                            |                    |
| 39  | Me-C≡CH                                                       | <b>1.45</b> <sup>43</sup>        |                                | 1.458 <sup>38</sup>            | 1.459 <sup>43</sup>        | 0.009              |
|     |                                                               |                                  |                                | 1.4589 <sup>1</sup>            |                            |                    |
|     |                                                               |                                  |                                | 1.4577 <sup>1</sup>            |                            |                    |
|     |                                                               |                                  |                                | <b>1.458</b> <sup>38</sup>     |                            |                    |
|     |                                                               |                                  |                                | 1.45836 <sup>1</sup>           |                            |                    |
|     |                                                               |                                  |                                | 1.4582 <sup>1</sup>            |                            | 0.004              |
| 40  | Me-C≡N                                                        |                                  |                                |                                |                            | 0.005              |
| 41  | CH <sub>2</sub> =CH-C≡CH                                      | <b>1.4314</b> <sup>43</sup>      |                                |                                | 1.426 <sup>43</sup>        |                    |
| 42  | CH <sub>2</sub> =CH-C≡N                                       |                                  |                                | <b>1.429</b> (5) <sup>6</sup>  |                            |                    |
|     |                                                               |                                  |                                | 1.4430 (2) <sup>6</sup>        | 1.430 <sup>7</sup>         |                    |
|     |                                                               |                                  |                                | 1.458 <sup>38</sup>            | 1.429 <sup>7</sup>         | 0.029              |
| 43  | HC≡C-C≡CH                                                     | <b>1.383</b> <sup>43</sup>       |                                | 1.3741 <sup>9</sup>            |                            | 0.011              |
| 44  | HC≡C-C≡N                                                      |                                  |                                | <b>1.3796</b> <sup>8</sup>     |                            |                    |
|     |                                                               |                                  |                                | 1.3793 <sup>9</sup>            |                            |                    |
|     |                                                               |                                  |                                | 1.206 <sup>38</sup>            |                            |                    |
|     |                                                               |                                  |                                | 1.3775 <sup>1</sup>            |                            |                    |
|     |                                                               |                                  |                                | 1.382 <sup>1</sup>             |                            |                    |
| 45  | Me-Ph                                                         | <b>1.5214</b> (65) <sup>15</sup> |                                | 1.512 (1) <sup>33</sup>        |                            | 0.176              |
|     |                                                               | 1.523 <sup>15</sup>              |                                |                                |                            |                    |
|     |                                                               | 1.51 (2) <sup>16</sup>           |                                |                                |                            | 0.013              |
| 46  | Et-Ph                                                         | <b>1.524</b> (9) <sup>17</sup>   |                                |                                |                            |                    |
| 47  | iPr-Ph                                                        | <b>1.50</b> (5) <sup>21</sup>    |                                |                                |                            |                    |
| 48  | tBu-Ph                                                        | <b>1.5237</b> <sup>23</sup>      |                                |                                |                            |                    |
| 49  | Ph-cycloC <sub>3</sub> H <sub>5</sub>                         | <b>1.520</b> (25) <sup>22</sup>  |                                |                                |                            |                    |
| 50  | Ph-CH=CH <sub>2</sub>                                         | <b>1.475</b> (23) <sup>18</sup>  |                                |                                |                            |                    |
| 51  | Ph-C≡CH                                                       | <b>1.436</b> (4) <sup>19</sup>   |                                | 1.4447 (7) <sup>19</sup>       |                            | 0.009              |
| 52  | Ph-C≡N                                                        | <b>1.438</b> (5) <sup>19</sup>   |                                | 1.444 <sup>19</sup>            |                            | 0.006              |
|     |                                                               | 1.434 (3) <sup>19</sup>          |                                | 1.4509 (6) <sup>19</sup>       |                            |                    |
|     |                                                               |                                  |                                | 1.388 <sup>38</sup>            |                            |                    |
|     |                                                               |                                  |                                | 1.4509 (6) <sup>20</sup>       |                            | 0.063              |
| 53  | Ph-Ph                                                         |                                  | 1.48 <sup>24</sup>             |                                |                            |                    |

TABLE S2. Experimental Bond Dissociation Enthalpies [kcal/mol].

| No. | Bond ID                                             | NIST <sup>46</sup> | Luo <sup>44</sup> | Griller <sup>49</sup> | Other Refs                | $\Delta\text{BDH}_{\text{exp}}$ |
|-----|-----------------------------------------------------|--------------------|-------------------|-----------------------|---------------------------|---------------------------------|
| 1   | Me-Me                                               | 89.68              | 90.2 ± 0.2        | 88.8                  | 88±2 <sup>43</sup>        | 2.2                             |
| 2   | Me-Et                                               | 87.2               | 88.5 ± 0.5        | 87.4                  |                           | 1.3                             |
| 3   | iPr-Me                                              | 88.9               | 88.2 ± 0.9        | 85.7                  | 87±2 <sup>43</sup>        | 3.2                             |
| 4   | tBu-Me                                              | 86                 | 86.9 ± 0.7        | 84                    | 82 <sup>43</sup>          | 4.9                             |
| 5   | (iPr) <sub>2</sub>                                  | 86.6               | 84.5 ± 1.1        | 81                    |                           | 5.6                             |
| 6   | (Me <sub>3</sub> C) <sub>2</sub> (tBu) <sub>2</sub> | 76                 | 68.3 ± 1.5        | 72.2                  |                           | 4.9                             |
| 7   | (PhCH <sub>2</sub> ) <sub>2</sub>                   | 66.6               | 62.6 ± 2.2        |                       |                           | 4                               |
| 8   | (AdMe <sub>2</sub> C) <sub>2</sub>                  |                    |                   |                       | 43.7 <sup>26</sup>        |                                 |
| 9   | (Et <sub>2</sub> MeC) <sub>2</sub>                  |                    |                   |                       | 60.2 <sup>37</sup>        |                                 |
| 10  | (Et <sub>3</sub> C) <sub>2</sub>                    |                    |                   |                       | 51.0 <sup>37</sup>        |                                 |
| 11  | (PhEt <sub>2</sub> C) <sub>2</sub>                  |                    |                   |                       | 44.7 <sup>27</sup>        |                                 |
| 14  | Et-Et                                               | 87.2               | 86.8 ± 0.6        | 86                    |                           | 1.2                             |
| 15  | tBu-C≡N                                             | 115.8              | 117.7 ± 1.3       | 109.2                 |                           | 8.5                             |
| 16  | (iPrMe <sub>2</sub> C) <sub>2</sub>                 |                    |                   |                       | 62.2 <sup>37</sup>        |                                 |
| 17  | (tBuMe <sub>2</sub> C) <sub>2</sub>                 |                    |                   |                       | 44.0 <sup>37</sup>        |                                 |
| 18  | (iBuMe <sub>2</sub> C) <sub>2</sub>                 |                    |                   |                       | 57.8 <sup>37</sup>        |                                 |
| 21  | H <sub>3</sub> C-CCl <sub>3</sub>                   | 88.3               | 87.6 ± 2.0        |                       | 87.6 ± 2.0 <sup>36</sup>  | 0.7                             |
| 29  | (Cl <sub>3</sub> C) <sub>2</sub>                    | 70.1               | 68.3 ± 1.5        |                       | 70.1 ± 3.5 <sup>50</sup>  | 1.8                             |
| 32  | Me-CH=CH <sub>2</sub>                               | 100.9              |                   | 93                    |                           | 7.9                             |
| 33  | H <sub>2</sub> C=CH <sub>2</sub>                    | 172.2              | 174.1 ± 1.5       |                       |                           | 2.1                             |
| 34  | (CH <sub>2</sub> =CH) <sub>2</sub>                  | 116                | 116.9 ± 1.5       |                       |                           | 0.9                             |
| 35  | Et-CH=CH <sub>2</sub>                               | 99.6               | 100.0 ± 1.0       | 91.4                  |                           | 8.6                             |
| 36  | iPr-CH=CH <sub>2</sub>                              | 99.7               | 99.2 ± 1.5        | 89.2                  |                           | 10.5                            |
| 37  | tBu-CH=CH <sub>2</sub>                              | 97.5               | 97.7 ± 1.3        | 87.3                  |                           | 10.4                            |
| 38  | HC≡CH                                               | 229.9              | 229.5 ± 1.0       |                       |                           | 0.4                             |
| 39  | Me-C≡CH                                             | 123.5              | 126.0 ± 1.0       | 122.2                 |                           | 3.8                             |
| 40  | Me-C≡N                                              | 121.1              | 124.7             | 118.2                 | 122.8 <sup>34</sup>       | 6.4                             |
| 41  | CH <sub>2</sub> =CH-C≡CH                            | 133.6              |                   |                       |                           |                                 |
| 42  | CH <sub>2</sub> =CH-C≡N                             | 132.1              | 133.9 ± 1.8       |                       |                           | 1.8                             |
| 43  | HC≡C-C≡CH                                           | 155                |                   |                       |                           |                                 |
| 44  | HC≡C-C≡N                                            | 152.4              | 143.9             |                       |                           | 8.5                             |
| 45  | Me-Ph                                               | 103.9              | 102.0 ± 1.0       | 101                   |                           | 2.9                             |
| 46  | Et-Ph                                               | 102.3              | 100.2 ± 1.0       | 99.5                  |                           | 2.8                             |
| 47  | iPr-Ph                                              | 102.1              | 98.9 ± 1.2        | 96.8                  |                           | 5.3                             |
| 48  | tBu-Ph                                              | 97.4               |                   | 93.4                  |                           | 4                               |
| 49  | Ph-cycloC <sub>3</sub> H <sub>5</sub>               |                    | 109.8 ± 1.2       |                       | 111.9 <sup>47</sup>       | 2.1                             |
| 50  | Ph-CH=CH <sub>2</sub>                               | 116.9              | 115.2 ± 1.3       |                       |                           | 1.7                             |
| 51  | Ph-C≡CH                                             | 140.7              |                   |                       | 141.2 ± 1.4 <sup>35</sup> | 0.5                             |
| 52  | Ph-C≡N                                              | 132.7              | 132.8 ± 2.0       |                       |                           | 0.1                             |
| 53  | Ph-Ph                                               | 118                | 114.4 ± 1.5       |                       |                           | 3.6                             |

TABLE S3. IUPAC Name for Compounds 1 - 53

| No. | Bond ID                                                      | IUPAC Name                                        |
|-----|--------------------------------------------------------------|---------------------------------------------------|
| 1   | Me-Me                                                        | ethane                                            |
| 2   | Me-Et                                                        | propane                                           |
| 3   | iPr-Me                                                       | 2-methylpropane                                   |
| 4   | tBu-Me                                                       | 2,2-dimethylpropane                               |
| 5   | (iPr) <sub>2</sub>                                           | 2,3-dimethylbutane                                |
| 6   | (tBu) <sub>2</sub>                                           | 2,2,3,3-tetramethylbutane                         |
| 7   | (PhCH <sub>2</sub> ) <sub>2</sub>                            | 1,2-diphenylethane                                |
| 8   | (AdMe <sub>2</sub> C) <sub>2</sub>                           | 2,3-diadamantyl-2,3-dimethylbutane                |
| 9   | (Et <sub>2</sub> MeC) <sub>2</sub>                           | 3,4-ethyl-3,4-methylhexane                        |
| 10  | (Et <sub>3</sub> C) <sub>2</sub>                             | 3,3,4,4-tetraethylhexane                          |
| 11  | (PhEt <sub>2</sub> C) <sub>2</sub>                           | 3,4-ethyl-3,4-phenylhexane                        |
| 12  | (Ph <sub>3</sub> C) <sub>2</sub>                             | hexaphenylethane                                  |
| 13  | hexakis                                                      | hexakis-(3,5-di-tert-butylphenyl)ethane           |
| 14  | Et-Et                                                        | butane                                            |
| 15  | tBu-C≡N                                                      | 2-cyano-2-methylpropane                           |
| 16  | (iPrMe <sub>2</sub> C) <sub>2</sub>                          | 2,3,3,4,4,5-hexamethylhexane                      |
| 17  | (tBuMe <sub>2</sub> C) <sub>2</sub>                          | 2,2,3,3,4,4,5,5-octamethylhexane                  |
| 18  | (iBuMe <sub>2</sub> C) <sub>2</sub>                          | 2,4,4,5,5,7-hexamethyloctane                      |
| 19  | diAd-Ad                                                      | 1-(1-adamantyl)diamantane                         |
| 20  | diAd-diAd                                                    | 1-(1-diamantyl)diamantane                         |
| 21  | triAd-Ad                                                     | 2-(1-adamantyl)triamantane                        |
| 22  | triAd-diAd                                                   | 2-(1-diamantyl)triamantane                        |
| 23  | triAd-triAd                                                  | 2-(2-triamantyl)triamantane                       |
| 24  | tetraAd-diAd                                                 | 2-(1-diamantyl)[121]tetramantane                  |
| 25  | bianthracene                                                 | bi(anthracene-9,10-dimethylene)                   |
| 26  | tetra-Ph-acenaphthene                                        | acenaphthene-5,6-diyl bis(diphenylmethylum)       |
| 27  | iron clamp                                                   | bis(1,4,5-trimethylimidazolyl)ketone iron complex |
| 28  | H <sub>3</sub> C-CCl <sub>3</sub>                            | 1,1,1-trichloroethane                             |
| 29  | (Cl <sub>3</sub> C) <sub>2</sub>                             | hexachloroethane                                  |
| 30a | CH <sub>3</sub> CH <sub>3</sub> <sup>+</sup> D <sub>3d</sub> | ethane cation, D <sub>3d</sub>                    |
| 30b | CH <sub>3</sub> CH <sub>3</sub> <sup>+</sup> C <sub>2h</sub> | ethane cation, C <sub>2h</sub>                    |
| 31  | C-C                                                          | di-N,N-dimethylamino-o-carborane                  |
| 32  | Me-CH=CH <sub>2</sub>                                        | propene                                           |
| 33  | H <sub>2</sub> C=CH <sub>2</sub>                             | ethene                                            |
| 34  | (CH <sub>2</sub> =CH) <sub>2</sub>                           | 1,3-butadiene                                     |
| 35  | Et-CH=CH <sub>2</sub>                                        | 1-butene                                          |
| 36  | iPr-CH=CH <sub>2</sub>                                       | 3-methyl-1-butene                                 |
| 37  | tBu-CH=CH <sub>2</sub>                                       | 3,3-dimethyl-1-butene                             |
| 38  | HC≡CH                                                        | ethyne                                            |
| 39  | Me-C≡CH                                                      | propyne                                           |
| 40  | Me-C≡N                                                       | acetonitrile                                      |
| 41  | CH <sub>2</sub> =CH-C≡CH                                     | buta-1-en-3-yne                                   |
| 42  | CH <sub>2</sub> =CH-C≡N                                      | cyanoethene                                       |
| 43  | HC≡C-C≡CH                                                    | 1,3-butadiyne                                     |
| 44  | HC≡C-C≡N                                                     | cyanoethyne                                       |
| 45  | Me-Ph                                                        | toluene                                           |
| 46  | Et-Ph                                                        | ethylbenzene                                      |
| 47  | iPr-Ph                                                       | cumene                                            |
| 48  | tBu-Ph                                                       | (1,1-dimethylethyl)benzene                        |
| 49  | Ph-cycloC <sub>3</sub> H <sub>5</sub>                        | cyclopropylbenzene                                |
| 50  | Ph-CH=CH <sub>2</sub>                                        | styrene                                           |
| 51  | Ph-C≡CH                                                      | phenylacetylene                                   |
| 52  | Ph-C≡N                                                       | cyanobenzene                                      |
| 53  | Ph-Ph                                                        | biphenyl                                          |



TABLE S4. Calculated bond distances  $R(\text{CC})$  in Å, local mode force constants  $k^a$  (CC) in mdyn/Å, energy densities  $H_b$  at the bond critical point  $r_b$  in Hartree/Å<sup>3</sup> and NBO charges in electrons for the CC bonds of fluorinated and chlorinated ethane at different levels of theory.

| Molecule                                            | $R(\text{CC})$ | $k^a$ | $H_b$  | Charge C1 | Charge C2 |
|-----------------------------------------------------|----------------|-------|--------|-----------|-----------|
| <b><math>\omega\text{B97X-D/aug-cc-pVTZ}</math></b> |                |       |        |           |           |
| H <sub>3</sub> C–CH <sub>3</sub>                    | 1.523          | 4.216 | -1.431 | -0.586    | -0.586    |
| H <sub>3</sub> C–CH <sub>2</sub> Cl                 | 1.511          | 4.310 | -1.548 | -0.591    | -0.441    |
| H <sub>3</sub> C–CHCl <sub>2</sub>                  | 1.507          | 4.282 | -1.607 | -0.590    | -0.359    |
| H <sub>3</sub> C–CCl <sub>3</sub>                   | 1.512          | 4.154 | -1.615 | -0.588    | -0.313    |
| CCl <sub>3</sub> –CH <sub>2</sub> Cl                | 1.526          | 3.863 | -1.511 | -0.317    | -0.455    |
| CCl <sub>3</sub> –CHCl <sub>2</sub>                 | 1.550          | 3.424 | -1.361 | -0.319    | -0.378    |
| ClC <sub>3</sub> –CCl <sub>3</sub>                  | 1.583          | 2.944 | -1.181 | -0.328    | -0.328    |
| H <sub>3</sub> C–CH <sub>2</sub> F                  | 1.508          | 4.365 | -1.608 | -0.643    | +0.085    |
| H <sub>3</sub> C–CHF <sub>2</sub>                   | 1.501          | 4.454 | -1.732 | -0.694    | +0.630    |
| H <sub>3</sub> C–CF <sub>3</sub>                    | 1.501          | 4.510 | -1.792 | -0.737    | +1.089    |
| CF <sub>3</sub> –CH <sub>2</sub> F                  | 1.519          | 4.239 | -1.818 | +1.033    | -0.069    |
| CF <sub>3</sub> –CHF <sub>2</sub>                   | 1.540          | 4.010 | -1.627 | +0.985    | +0.477    |
| F <sub>3</sub> C–CF <sub>3</sub>                    | 1.555          | 3.943 | -1.560 | +0.962    | +0.962    |
| <b>PBE0-D3/aug-cc-pVTZ</b>                          |                |       |        |           |           |
| H <sub>3</sub> C–CH <sub>3</sub>                    | 1.520          | 4.286 | -1.456 | -0.601    | -1.601    |
| H <sub>3</sub> C–CH <sub>2</sub> Cl                 | 1.507          | 4.378 | -1.573 | -0.622    | -0.348    |
| H <sub>3</sub> C–CHCl <sub>2</sub>                  | 1.503          | 4.355 | -1.636 | -0.637    | -0.194    |
| H <sub>3</sub> C–CCl <sub>3</sub>                   | 1.507          | 4.232 | -1.649 | -0.655    | -0.112    |
| CCl <sub>3</sub> –CH <sub>2</sub> Cl                | 1.522          | 3.909 | -1.540 | -0.147    | -0.431    |
| CCl <sub>3</sub> –CHCl <sub>2</sub>                 | 1.547          | 3.447 | -1.384 | -0.174    | -0.287    |
| ClC <sub>3</sub> –CCl <sub>3</sub>                  | 1.580          | 2.926 | -1.201 | -0.206    | -0.206    |
| H <sub>3</sub> C–CH <sub>2</sub> F                  | 1.504          | 4.435 | -1.632 | -0.644    | +0.069    |
| H <sub>3</sub> C–CHF <sub>2</sub>                   | 1.497          | 4.530 | -1.758 | -0.675    | +0.589    |
| H <sub>3</sub> C–CF <sub>3</sub>                    | 1.497          | 4.585 | -1.821 | -0.699    | +1.013    |
| CF <sub>3</sub> –CH <sub>2</sub> F                  | 1.515          | 4.310 | -1.748 | +0.970    | -0.026    |
| CF <sub>3</sub> –CHF <sub>2</sub>                   | 1.536          | 4.079 | -1.656 | +0.943    | +0.501    |
| F <sub>3</sub> C–CF <sub>3</sub>                    | 1.550          | 4.015 | -1.589 | +0.922    | +0.922    |

Optimized coordinates of all molecules in this study

Molecule 1

|   |          |          |          |
|---|----------|----------|----------|
| C | 0.00000  | 0.00000  | 0.76156  |
| C | 0.00000  | 0.00000  | -0.76156 |
| H | -0.22142 | 0.99159  | 1.15708  |
| H | 0.22142  | -0.99159 | -1.15708 |
| H | 0.96945  | -0.30404 | 1.15708  |
| H | -0.74803 | -0.68755 | 1.15708  |
| H | 0.74803  | 0.68755  | -1.15708 |
| H | -0.96945 | 0.30404  | -1.15708 |

Molecule 2

|   |          |          |          |
|---|----------|----------|----------|
| C | 0.00000  | 1.26755  | -0.25924 |
| C | 0.00000  | 0.00000  | 0.58627  |
| C | 0.00000  | -1.26755 | -0.25924 |
| H | 0.00000  | 2.16395  | 0.36127  |
| H | -0.88054 | 1.30657  | -0.90333 |
| H | 0.88054  | 1.30657  | -0.90333 |
| H | -0.87362 | 0.00000  | 1.24202  |
| H | 0.87362  | 0.00000  | 1.24202  |
| H | 0.00000  | -2.16395 | 0.36127  |
| H | 0.88054  | -1.30657 | -0.90333 |
| H | -0.88054 | -1.30657 | -0.90333 |

Molecule 3

|   |         |         |          |
|---|---------|---------|----------|
| C | 0.00000 | 0.00000 | 0.76156  |
| C | 0.00000 | 0.00000 | -0.76156 |

|   |          |          |          |
|---|----------|----------|----------|
| H | -0.22142 | 0.99159  | 1.15708  |
| H | 0.22142  | -0.99159 | -1.15708 |
| H | 0.96945  | -0.30404 | 1.15708  |
| H | -0.74803 | -0.68755 | 1.15708  |
| H | 0.74803  | 0.68755  | -1.15708 |
| H | -0.96945 | 0.30404  | -1.15708 |

Molecule 4

|   |          |          |          |
|---|----------|----------|----------|
| C | -0.77362 | -1.24560 | 0.43739  |
| C | 0.00000  | 0.00000  | 0.00000  |
| C | 0.47540  | 0.76553  | 1.23663  |
| C | 1.21043  | -0.41912 | -0.83697 |
| C | -0.91221 | 0.89918  | -0.83705 |
| H | 1.03151  | 1.66092  | 0.95226  |
| H | -0.37037 | 1.07695  | 1.85269  |
| H | 1.12944  | 0.14547  | 1.85275  |
| H | 1.78120  | 0.45263  | -1.16273 |
| H | 1.87912  | -1.06282 | -0.26224 |
| H | 0.89867  | -0.96839 | -1.72745 |
| H | -0.38380 | 1.79724  | -1.16280 |
| H | -1.26632 | 0.37622  | -1.72753 |
| H | -1.78567 | 1.21326  | -0.26237 |
| H | -1.64431 | -0.97432 | 1.03750  |
| H | -0.14451 | -1.90580 | 1.03756  |
| H | -1.12496 | -1.81136 | -0.42766 |

Molecule 5

|   |          |          |         |
|---|----------|----------|---------|
| C | -0.16489 | 0.75261  | 0.00000 |
| C | 0.16489  | -0.75261 | 0.00000 |
| H | 1.25786  | -0.84305 | 0.00000 |

|   |          |          |          |
|---|----------|----------|----------|
| C | -0.36571 | -1.45872 | 1.24747  |
| C | -0.36571 | -1.45872 | -1.24747 |
| H | -0.17398 | -2.53090 | 1.19261  |
| H | 0.09675  | -1.09014 | 2.16160  |
| H | -1.44635 | -1.31961 | 1.33671  |
| H | -0.17398 | -2.53090 | -1.19261 |
| H | -1.44635 | -1.31961 | -1.33671 |
| H | 0.09675  | -1.09014 | -2.16160 |
| H | -1.25786 | 0.84305  | 0.00000  |
| C | 0.36571  | 1.45872  | 1.24747  |
| C | 0.36571  | 1.45872  | -1.24747 |
| H | 0.17398  | 2.53090  | 1.19261  |
| H | -0.09675 | 1.09014  | 2.16160  |
| H | 1.44635  | 1.31961  | 1.33671  |
| H | 0.17398  | 2.53090  | -1.19261 |
| H | 1.44635  | 1.31961  | -1.33671 |
| H | -0.09675 | 1.09014  | -2.16160 |

Molecule 6

|   |          |          |          |
|---|----------|----------|----------|
| C | -0.77362 | -1.24560 | 0.43739  |
| C | 0.00000  | 0.00000  | 0.00000  |
| C | 0.47540  | 0.76553  | 1.23663  |
| C | 1.21043  | -0.41912 | -0.83697 |
| C | -0.91221 | 0.89918  | -0.83705 |
| H | 1.03151  | 1.66092  | 0.95226  |
| H | -0.37037 | 1.07695  | 1.85269  |
| H | 1.12944  | 0.14547  | 1.85275  |
| H | 1.78120  | 0.45263  | -1.16273 |
| H | 1.87912  | -1.06282 | -0.26224 |
| H | 0.89867  | -0.96839 | -1.72745 |
| H | -0.38380 | 1.79724  | -1.16280 |

|   |          |          |          |
|---|----------|----------|----------|
| H | -1.26632 | 0.37622  | -1.72753 |
| H | -1.78567 | 1.21326  | -0.26237 |
| H | -1.64431 | -0.97432 | 1.03750  |
| H | -0.14451 | -1.90580 | 1.03756  |
| H | -1.12496 | -1.81136 | -0.42766 |

Molecule 7

|   |          |          |          |
|---|----------|----------|----------|
| C | 0.52703  | 0.56262  | 1.95011  |
| C | -0.52703 | -0.56262 | 1.95011  |
| H | 0.42402  | 1.13471  | 2.87386  |
| H | 1.52189  | 0.11395  | 1.95914  |
| H | -0.42402 | -1.13471 | 2.87386  |
| H | -1.52189 | -0.11395 | 1.95914  |
| C | 0.39279  | 1.48162  | 0.76660  |
| C | -0.52314 | 2.52877  | 0.78733  |
| C | 1.13136  | 1.27112  | -0.39252 |
| C | -0.69835 | 3.34473  | -0.31902 |
| C | 0.96050  | 2.08411  | -1.50216 |
| C | 0.04405  | 3.12358  | -1.46950 |
| H | -1.10579 | 2.70756  | 1.68335  |
| H | 1.83768  | 0.45139  | -0.42953 |
| H | -1.41264 | 4.15633  | -0.28230 |
| H | 1.54261  | 1.90254  | -2.39555 |
| H | -0.08965 | 3.75942  | -2.33401 |
| C | -0.39279 | -1.48162 | 0.76660  |
| C | 0.52314  | -2.52877 | 0.78733  |
| C | -1.13136 | -1.27112 | -0.39252 |
| C | 0.69835  | -3.34473 | -0.31902 |
| C | -0.96050 | -2.08411 | -1.50216 |
| C | -0.04405 | -3.12358 | -1.46950 |
| H | 1.10579  | -2.70756 | 1.68335  |

|   |          |          |          |
|---|----------|----------|----------|
| H | -1.83768 | -0.45139 | -0.42953 |
| H | 1.41264  | -4.15633 | -0.28230 |
| H | -1.54261 | -1.90254 | -2.39555 |
| H | 0.08965  | -3.75942 | -2.33401 |

Molecule 8

|   |          |          |          |
|---|----------|----------|----------|
| C | -0.61188 | -0.53729 | -0.31078 |
| C | 0.61188  | 0.53729  | -0.31078 |
| C | 1.63377  | 0.19370  | 0.78458  |
| C | 1.34515  | 0.44688  | -1.66722 |
| H | 2.39786  | 0.96483  | 0.85848  |
| H | 1.17468  | 0.09907  | 1.76502  |
| H | 2.15585  | -0.73271 | 0.56961  |
| H | 2.35159  | 0.85344  | -1.59016 |
| H | 1.44623  | -0.57385 | -2.00842 |
| H | 0.82734  | 0.99323  | -2.45428 |
| C | -1.63377 | -0.19370 | 0.78458  |
| C | -1.34515 | -0.44688 | -1.66722 |
| H | -2.39786 | -0.96483 | 0.85848  |
| H | -1.17468 | -0.09907 | 1.76502  |
| H | -2.15585 | 0.73271  | 0.56961  |
| H | -2.35159 | -0.85344 | -1.59016 |
| H | -1.44623 | 0.57385  | -2.00842 |
| H | -0.82734 | -0.99323 | -2.45428 |
| C | 0.22985  | 2.11020  | -0.08661 |
| C | -0.33237 | 3.95774  | 1.60165  |
| C | -0.05247 | 2.46482  | 1.39739  |
| C | -0.95496 | 2.62901  | -0.93611 |
| C | 1.43911  | 3.00034  | -0.50782 |
| C | -1.22375 | 4.12388  | -0.71698 |
| C | 1.18888  | 4.49582  | -0.28072 |

|   |          |          |          |
|---|----------|----------|----------|
| C | -1.53644 | 4.37784  | 0.75817  |
| C | 0.89546  | 4.76851  | 1.19284  |
| C | -0.00139 | 4.94139  | -1.12902 |
| H | -0.54904 | 4.12533  | 2.65874  |
| H | -2.08176 | 4.41033  | -1.32869 |
| H | 2.08365  | 5.04230  | -0.58634 |
| H | -0.90032 | 1.90707  | 1.78032  |
| H | 0.80648  | 2.19605  | 2.01203  |
| H | -0.74671 | 2.46966  | -1.99659 |
| H | -1.87214 | 2.09248  | -0.70761 |
| H | 2.33871  | 2.71270  | 0.03757  |
| H | 1.65343  | 2.86477  | -1.56633 |
| H | -1.76303 | 5.43498  | 0.91958  |
| H | -2.42037 | 3.80821  | 1.05798  |
| H | 1.75326  | 4.48316  | 1.80760  |
| H | 0.72176  | 5.83583  | 1.35356  |
| H | -0.19198 | 6.00861  | -0.98855 |
| H | 0.21384  | 4.78701  | -2.18965 |
| C | -0.22985 | -2.11020 | -0.08661 |
| C | 0.33237  | -3.95774 | 1.60165  |
| C | 0.05247  | -2.46482 | 1.39739  |
| C | 0.95496  | -2.62901 | -0.93611 |
| C | -1.43911 | -3.00034 | -0.50782 |
| C | 1.22375  | -4.12388 | -0.71698 |
| C | -1.18888 | -4.49582 | -0.28072 |
| C | 1.53644  | -4.37784 | 0.75817  |
| C | -0.89546 | -4.76851 | 1.19284  |
| C | 0.00139  | -4.94139 | -1.12902 |
| H | 0.54904  | -4.12533 | 2.65874  |
| H | 2.08176  | -4.41033 | -1.32869 |
| H | -2.08365 | -5.04230 | -0.58634 |
| H | 0.90032  | -1.90707 | 1.78032  |

|   |          |          |          |
|---|----------|----------|----------|
| H | -0.80648 | -2.19605 | 2.01203  |
| H | 0.74671  | -2.46966 | -1.99659 |
| H | 1.87214  | -2.09248 | -0.70761 |
| H | -2.33871 | -2.71270 | 0.03757  |
| H | -1.65343 | -2.86477 | -1.56633 |
| H | 1.76303  | -5.43498 | 0.91958  |
| H | 2.42037  | -3.80821 | 1.05798  |
| H | -1.75326 | -4.48316 | 1.80760  |
| H | -0.72176 | -5.83583 | 1.35356  |
| H | 0.19198  | -6.00861 | -0.98855 |
| H | -0.21384 | -4.78701 | -2.18965 |

Molecule 9

|   |          |          |          |
|---|----------|----------|----------|
| C | -0.80008 | 0.02193  | -0.17253 |
| C | 0.70191  | -0.02884 | 0.36785  |
| C | 0.77085  | 0.63181  | 1.75630  |
| C | 1.23971  | -1.47124 | 0.58801  |
| C | 1.65581  | 0.71101  | -0.60223 |
| H | 1.74116  | 0.45411  | 2.21849  |
| H | 0.62463  | 1.70971  | 1.71254  |
| H | 0.01985  | 0.21986  | 2.43081  |
| C | 1.41090  | -2.40366 | -0.60746 |
| H | 2.21884  | -1.36302 | 1.05756  |
| H | 0.62869  | -1.96896 | 1.34144  |
| C | 3.10392  | 0.86943  | -0.14576 |
| H | 1.66128  | 0.19260  | -1.56062 |
| H | 1.25851  | 1.70186  | -0.80965 |
| C | -0.86978 | -0.16936 | -1.69618 |
| C | -1.61510 | -1.11670 | 0.50037  |
| C | -1.53085 | 1.34983  | 0.16636  |
| H | -1.90931 | -0.21316 | -2.02173 |



|   |          |          |          |
|---|----------|----------|----------|
| H | -0.40534 | 0.65301  | -2.23625 |
| H | -0.38484 | -1.08719 | -2.02012 |
| C | -3.12949 | -1.12335 | 0.29844  |
| H | -1.23279 | -2.07212 | 0.14174  |
| H | -1.42711 | -1.09950 | 1.57612  |
| C | -0.98505 | 2.68298  | -0.34072 |
| H | -2.53573 | 1.25424  | -0.24692 |
| H | -1.66758 | 1.41582  | 1.24802  |
| H | 1.94630  | -3.30143 | -0.29643 |
| H | 0.46097  | -2.72741 | -1.02971 |
| H | 1.99005  | -1.94264 | -1.40795 |
| H | 3.67185  | 1.40742  | -0.90512 |
| H | 3.18340  | 1.43693  | 0.78122  |
| H | 3.59778  | -0.09047 | 0.00570  |
| H | -3.54515 | -2.04689 | 0.70232  |
| H | -3.62043 | -0.29765 | 0.81141  |
| H | -3.40919 | -1.07769 | -0.75445 |
| H | -1.72102 | 3.46600  | -0.15398 |
| H | -0.06451 | 2.98494  | 0.15522  |
| H | -0.79678 | 2.66851  | -1.41440 |

Molecule 10

|   |          |          |          |
|---|----------|----------|----------|
| C | 0.00000  | 0.00000  | 0.78827  |
| C | 0.00000  | 0.00000  | -0.78827 |
| C | 0.21657  | -1.41442 | -1.34471 |
| C | -1.33321 | 0.51965  | -1.34471 |
| C | 1.11664  | 0.89476  | -1.34471 |
| H | 0.07866  | -1.40859 | -2.42719 |
| H | 1.22432  | -1.77815 | -1.14582 |
| H | -0.49103 | -2.13288 | -0.92963 |
| H | -1.25920 | 0.63617  | -2.42719 |

|   |          |          |          |
|---|----------|----------|----------|
| H | -2.15209 | -0.17122 | -1.14582 |
| H | -1.60161 | 1.49168  | -0.92963 |
| H | 1.18054  | 0.77242  | -2.42719 |
| H | 0.92776  | 1.94937  | -1.14582 |
| H | 2.09264  | 0.64120  | -0.92963 |
| C | 0.11542  | 1.42624  | 1.34471  |
| C | -1.29287 | -0.61316 | 1.34471  |
| C | 1.17745  | -0.81307 | 1.34471  |
| H | -0.02173 | 1.41061  | 2.42719  |
| H | 1.09475  | 1.86073  | 1.14582  |
| H | -0.64149 | 2.09255  | 0.92963  |
| H | -1.21077 | -0.72412 | 2.42719  |
| H | -2.15882 | 0.01771  | 1.14582  |
| H | -1.49146 | -1.60182 | 0.92963  |
| H | 1.23249  | -0.68649 | 2.42719  |
| H | 1.06407  | -1.87844 | 1.14582  |
| H | 2.13294  | -0.49073 | 0.92963  |

Molecule 11

|   |          |          |          |
|---|----------|----------|----------|
| C | 0.56915  | -0.58345 | -0.76479 |
| C | -0.56915 | 0.58345  | -0.76479 |
| C | -0.58582 | 1.33872  | -2.11747 |
| C | -2.01114 | 0.03712  | -0.52337 |
| C | -1.58567 | 2.48923  | -2.22051 |
| H | 0.40636  | 1.71136  | -2.35698 |
| H | -0.81621 | 0.62796  | -2.90760 |
| C | -2.74792 | -0.69026 | -1.64598 |
| H | -2.01723 | -0.61362 | 0.34660  |
| H | -2.61864 | 0.89931  | -0.24478 |
| C | 0.58582  | -1.33872 | -2.11747 |
| C | 2.01114  | -0.03712 | -0.52337 |

|   |          |          |          |
|---|----------|----------|----------|
| C | 1.58567  | -2.48923 | -2.22051 |
| H | -0.40636 | -1.71136 | -2.35698 |
| H | 0.81621  | -0.62796 | -2.90760 |
| C | 2.74792  | 0.69026  | -1.64598 |
| H | 2.01723  | 0.61362  | 0.34660  |
| H | 2.61864  | -0.89931 | -0.24478 |
| H | -1.46525 | 2.99840  | -3.17700 |
| H | -2.61578 | 2.13857  | -2.16696 |
| H | -1.44803 | 3.22579  | -1.43043 |
| H | -3.77596 | -0.86998 | -1.32976 |
| H | -2.79159 | -0.11373 | -2.56897 |
| H | -2.31810 | -1.66036 | -1.88209 |
| H | 1.46525  | -2.99840 | -3.17700 |
| H | 2.61578  | -2.13857 | -2.16696 |
| H | 1.44803  | -3.22579 | -1.43043 |
| H | 3.77596  | 0.86998  | -1.32976 |
| H | 2.79159  | 0.11373  | -2.56897 |
| H | 2.31810  | 1.66036  | -1.88209 |
| C | -0.26588 | 1.56572  | 0.38391  |
| C | -0.75914 | 1.36224  | 1.67219  |
| C | 0.53203  | 2.69487  | 0.19425  |
| C | -0.45827 | 2.22431  | 2.71611  |
| C | 0.83608  | 3.56270  | 1.22937  |
| C | 0.34430  | 3.33097  | 2.50358  |
| H | -1.38322 | 0.50940  | 1.88686  |
| H | 0.93290  | 2.91571  | -0.78318 |
| H | -0.85851 | 2.02343  | 3.70092  |
| H | 1.45901  | 4.42547  | 1.03456  |
| H | 0.57818  | 4.00632  | 3.31514  |
| C | 0.26588  | -1.56572 | 0.38391  |
| C | 0.75914  | -1.36224 | 1.67219  |
| C | -0.53203 | -2.69487 | 0.19425  |

|   |          |          |          |
|---|----------|----------|----------|
| C | 0.45827  | -2.22431 | 2.71611  |
| C | -0.83608 | -3.56270 | 1.22937  |
| C | -0.34430 | -3.33097 | 2.50358  |
| H | 1.38322  | -0.50940 | 1.88686  |
| H | -0.93290 | -2.91571 | -0.78318 |
| H | 0.85851  | -2.02343 | 3.70092  |
| H | -1.45901 | -4.42547 | 1.03456  |
| H | -0.57818 | -4.00632 | 3.31514  |

Molecule 12

|   |          |          |          |
|---|----------|----------|----------|
| C | 0.00000  | 0.00000  | 0.81910  |
| C | 0.00000  | 0.00000  | -0.81910 |
| C | -0.30342 | 1.46450  | 1.37663  |
| C | -0.53254 | 2.57039  | 0.54768  |
| C | -0.36251 | 1.74974  | 2.74131  |
| C | -0.79519 | 3.83812  | 1.03279  |
| C | -0.62497 | 3.01651  | 3.24325  |
| C | -0.84533 | 4.08014  | 2.39283  |
| H | -0.51290 | 2.47559  | -0.52001 |
| H | -0.20652 | 0.99682  | 3.48386  |
| H | -0.96112 | 4.63901  | 0.32534  |
| H | -0.65380 | 3.15568  | 4.31546  |
| H | -1.05033 | 5.06958  | 2.77749  |
| C | 0.30342  | -1.46450 | -1.37663 |
| C | 0.53254  | -2.57039 | -0.54768 |
| C | 0.36251  | -1.74974 | -2.74131 |
| C | 0.79519  | -3.83812 | -1.03279 |
| C | 0.62497  | -3.01651 | -3.24325 |
| C | 0.84533  | -4.08014 | -2.39283 |
| H | 0.51290  | -2.47559 | 0.52001  |
| H | 0.20652  | -0.99682 | -3.48386 |
| H | 0.96112  | -4.63901 | -0.32534 |

|   |          |          |          |
|---|----------|----------|----------|
| H | 0.65380  | -3.15568 | -4.31546 |
| H | 1.05033  | -5.06958 | -2.77749 |
| C | -1.42000 | 0.46948  | -1.37663 |
| C | -2.49229 | 0.82400  | -0.54768 |
| C | -1.69658 | 0.56092  | -2.74131 |
| C | -3.72150 | 1.23040  | -1.03279 |
| C | -2.92486 | 0.96702  | -3.24325 |
| C | -3.95618 | 1.30799  | -2.39283 |
| H | -2.40037 | 0.79361  | 0.52001  |
| H | -0.96653 | 0.31956  | -3.48386 |
| H | -4.49806 | 1.48715  | -0.32534 |
| H | -3.05980 | 1.01163  | -4.31546 |
| H | -4.91555 | 1.62518  | -2.77749 |
| C | 1.11659  | 0.99502  | -1.37663 |
| C | 1.95976  | 1.74639  | -0.54768 |
| C | 1.33406  | 1.18882  | -2.74131 |
| C | 2.92631  | 2.60771  | -1.03279 |
| C | 2.29989  | 2.04949  | -3.24325 |
| C | 3.11084  | 2.77215  | -2.39283 |
| H | 1.88748  | 1.68198  | 0.52001  |
| H | 0.76001  | 0.67726  | -3.48386 |
| H | 3.53694  | 3.15186  | -0.32534 |
| H | 2.40600  | 2.14405  | -4.31546 |
| H | 3.86522  | 3.44440  | -2.77749 |
| C | -1.11659 | -0.99502 | 1.37663  |
| C | -1.95976 | -1.74639 | 0.54768  |
| C | -1.33406 | -1.18882 | 2.74131  |
| C | -2.92631 | -2.60771 | 1.03279  |
| C | -2.29989 | -2.04949 | 3.24325  |
| C | -3.11084 | -2.77215 | 2.39283  |
| H | -1.88748 | -1.68198 | -0.52001 |
| H | -0.76001 | -0.67726 | 3.48386  |

|   |          |          |          |
|---|----------|----------|----------|
| H | -3.53694 | -3.15186 | 0.32534  |
| H | -2.40600 | -2.14405 | 4.31546  |
| H | -3.86522 | -3.44440 | 2.77749  |
| C | 1.42000  | -0.46948 | 1.37663  |
| C | 2.49229  | -0.82400 | 0.54768  |
| C | 1.69658  | -0.56092 | 2.74131  |
| C | 3.72150  | -1.23040 | 1.03279  |
| C | 2.92486  | -0.96702 | 3.24325  |
| C | 3.95618  | -1.30799 | 2.39283  |
| H | 2.40037  | -0.79361 | -0.52001 |
| H | 0.96653  | -0.31956 | 3.48386  |
| H | 4.49806  | -1.48715 | 0.32534  |
| H | 3.05980  | -1.01163 | 4.31546  |
| H | 4.91555  | -1.62518 | 2.77749  |

Molecule 13

|   |          |          |          |
|---|----------|----------|----------|
| C | 0.00000  | 0.00000  | 0.74077  |
| C | -0.42330 | 1.11958  | 1.45444  |
| C | 0.42330  | -1.11958 | 1.45444  |
| C | -0.42352 | 1.12031  | 2.83963  |
| C | 0.42352  | -1.12031 | 2.83963  |
| C | 0.00000  | 0.00000  | 3.53795  |
| H | -0.77583 | 1.99072  | 0.91809  |
| H | 0.77583  | -1.99072 | 0.91809  |
| H | -0.76306 | 1.99652  | 3.37523  |
| H | 0.76306  | -1.99652 | 3.37523  |
| H | 0.00000  | 0.00000  | 4.61929  |
| C | 0.00000  | 0.00000  | -0.74077 |
| C | -0.42330 | -1.11958 | -1.45444 |
| C | 0.42330  | 1.11958  | -1.45444 |
| C | -0.42352 | -1.12031 | -2.83963 |

|   |          |          |          |
|---|----------|----------|----------|
| C | 0.42352  | 1.12031  | -2.83963 |
| C | 0.00000  | 0.00000  | -3.53795 |
| H | -0.77583 | -1.99072 | -0.91809 |
| H | 0.77583  | 1.99072  | -0.91809 |
| H | -0.76306 | -1.99652 | -3.37523 |
| H | 0.76306  | 1.99652  | -3.37523 |
| H | 0.00000  | 0.00000  | -4.61929 |

Molecule 14

|   |          |          |          |
|---|----------|----------|----------|
| C | 0.70144  | 1.65585  | 0.75774  |
| C | 0.70144  | 0.27110  | 0.12406  |
| C | -0.70144 | -0.27110 | -0.12406 |
| H | 1.71528  | 2.02005  | 0.92440  |
| H | 0.18820  | 1.64454  | 1.72101  |
| H | 0.18820  | 2.37742  | 0.11949  |
| H | 1.24633  | -0.42667 | 0.76619  |
| H | 1.24633  | 0.30090  | -0.82374 |
| C | -0.70144 | -1.65585 | -0.75774 |
| H | -1.71528 | -2.02005 | -0.92440 |
| H | -1.24633 | -0.30090 | 0.82374  |
| H | -1.24633 | 0.42667  | -0.76619 |
| H | -0.18820 | -2.37742 | -0.11949 |
| H | -0.18820 | -1.64454 | -1.72101 |

Molecule 15

|   |          |          |          |
|---|----------|----------|----------|
| C | 0.00000  | 0.00000  | 1.19377  |
| C | 0.00000  | 0.00000  | -0.27821 |
| C | -0.88540 | 1.15433  | -0.76733 |
| C | 1.44238  | 0.18962  | -0.76733 |
| C | -0.55698 | -1.34395 | -0.76733 |

|   |          |          |          |
|---|----------|----------|----------|
| H | -0.89223 | 1.16323  | -1.85770 |
| H | -1.90979 | 1.03800  | -0.41608 |
| H | -0.50755 | 2.11356  | -0.41608 |
| H | 1.45350  | 0.19108  | -1.85770 |
| H | 1.85383  | 1.13493  | -0.41608 |
| H | 2.08417  | -0.61723 | -0.41608 |
| H | -0.56127 | -1.35431 | -1.85770 |
| H | 0.05596  | -2.17293 | -0.41608 |
| H | -1.57663 | -1.49633 | -0.41608 |
| N | 0.00000  | 0.00000  | 2.34116  |

Molecule 16

|   |          |          |          |
|---|----------|----------|----------|
| C | -0.60510 | -0.52264 | 0.16978  |
| C | 0.60510  | 0.52264  | 0.16978  |
| C | 0.09116  | 2.00655  | 0.02389  |
| C | 1.37471  | 0.37518  | 1.49689  |
| C | 1.62921  | 0.25416  | -0.94124 |
| H | 2.31513  | 0.92272  | 1.45660  |
| H | 0.81397  | 0.74806  | 2.35169  |
| H | 1.62206  | -0.66688 | 1.69559  |
| H | 2.38772  | 1.03910  | -0.93679 |
| H | 2.14905  | -0.68999 | -0.78498 |
| H | 1.18441  | 0.23917  | -1.93426 |
| C | -0.09116 | -2.00655 | 0.02389  |
| C | -1.37471 | -0.37518 | 1.49689  |
| C | -1.62921 | -0.25416 | -0.94124 |
| H | -2.31513 | -0.92272 | 1.45660  |
| H | -0.81397 | -0.74806 | 2.35169  |
| H | -1.62206 | 0.66688  | 1.69559  |
| H | -2.38772 | -1.03910 | -0.93679 |
| H | -2.14905 | 0.68999  | -0.78498 |



|   |          |          |          |
|---|----------|----------|----------|
| H | -1.18441 | -0.23917 | -1.93426 |
| C | 0.97642  | 3.04287  | 0.72595  |
| C | -0.09116 | 2.49284  | -1.42088 |
| H | -0.88530 | 2.06300  | 0.50748  |
| H | 0.58798  | 4.04340  | 0.53189  |
| H | 1.01431  | 2.91044  | 1.80483  |
| H | 2.00014  | 3.01571  | 0.34569  |
| H | -0.62899 | 3.44193  | -1.41780 |
| H | 0.87451  | 2.67237  | -1.89590 |
| H | -0.64606 | 1.80485  | -2.05042 |
| C | -0.97642 | -3.04287 | 0.72595  |
| C | 0.09116  | -2.49284 | -1.42088 |
| H | 0.88530  | -2.06300 | 0.50748  |
| H | -0.58798 | -4.04340 | 0.53189  |
| H | -1.01431 | -2.91044 | 1.80483  |
| H | -2.00014 | -3.01571 | 0.34569  |
| H | 0.62899  | -3.44193 | -1.41780 |
| H | -0.87451 | -2.67237 | -1.89590 |
| H | 0.64606  | -1.80485 | -2.05042 |

Molecule 17

|   |          |          |          |
|---|----------|----------|----------|
| C | 0.51961  | 0.63295  | 0.00000  |
| C | -0.51961 | -0.63295 | 0.00000  |
| C | 0.12788  | -2.13458 | 0.00000  |
| C | -1.44355 | -0.55026 | 1.22946  |
| C | -1.44355 | -0.55026 | -1.22946 |
| H | -2.05742 | -1.43961 | 1.32278  |
| H | -0.90913 | -0.42452 | 2.16806  |
| H | -2.13630 | 0.27525  | 1.13441  |
| H | -2.05742 | -1.43961 | -1.32278 |
| H | -2.13630 | 0.27525  | -1.13441 |

|   |          |          |          |
|---|----------|----------|----------|
| H | -0.90913 | -0.42452 | -2.16806 |
| C | -0.12788 | 2.13458  | 0.00000  |
| C | 1.44355  | 0.55026  | 1.22946  |
| C | 1.44355  | 0.55026  | -1.22946 |
| H | 2.05742  | 1.43961  | 1.32278  |
| H | 0.90913  | 0.42452  | 2.16806  |
| H | 2.13630  | -0.27525 | 1.13441  |
| H | 2.05742  | 1.43961  | -1.32278 |
| H | 2.13630  | -0.27525 | -1.13441 |
| H | 0.90913  | 0.42452  | -2.16806 |
| C | -0.99106 | -3.21308 | 0.00000  |
| C | 0.97326  | -2.47546 | -1.24318 |
| C | 0.97326  | -2.47546 | 1.24318  |
| H | -0.51182 | -4.19155 | 0.00000  |
| H | -1.62593 | -3.18262 | 0.88178  |
| H | -1.62593 | -3.18262 | -0.88178 |
| H | 1.07027  | -3.55917 | -1.32268 |
| H | 0.51790  | -2.12306 | -2.16747 |
| H | 1.98322  | -2.08223 | -1.18952 |
| H | 1.07027  | -3.55917 | 1.32268  |
| H | 1.98322  | -2.08223 | 1.18952  |
| H | 0.51790  | -2.12306 | 2.16747  |
| C | 0.99106  | 3.21308  | 0.00000  |
| C | -0.97326 | 2.47546  | -1.24318 |
| C | -0.97326 | 2.47546  | 1.24318  |
| H | 0.51182  | 4.19155  | 0.00000  |
| H | 1.62593  | 3.18262  | 0.88178  |
| H | 1.62593  | 3.18262  | -0.88178 |
| H | -1.07027 | 3.55917  | -1.32268 |
| H | -0.51790 | 2.12306  | -2.16747 |
| H | -1.98322 | 2.08223  | -1.18952 |
| H | -1.07027 | 3.55917  | 1.32268  |

|   |          |         |         |
|---|----------|---------|---------|
| H | -1.98322 | 2.08223 | 1.18952 |
| H | -0.51790 | 2.12306 | 2.16747 |

Molecule 18

|   |          |          |          |
|---|----------|----------|----------|
| C | -0.44540 | -0.65793 | -0.05783 |
| C | 0.44540  | 0.65793  | -0.05783 |
| C | -0.45280 | 1.90397  | -0.26321 |
| C | 1.22833  | 0.77187  | 1.25746  |
| C | 1.46770  | 0.63108  | -1.20535 |
| H | 1.94081  | 1.59536  | 1.20865  |
| H | 0.57555  | 0.95066  | 2.10999  |
| H | 1.80086  | -0.13318 | 1.46065  |
| H | 1.96427  | 1.59785  | -1.29096 |
| H | 2.24529  | -0.11331 | -1.04033 |
| H | 0.99737  | 0.42246  | -2.16686 |
| C | 0.45280  | -1.90397 | -0.26321 |
| C | -1.22833 | -0.77187 | 1.25746  |
| C | -1.46770 | -0.63108 | -1.20535 |
| H | -1.94081 | -1.59536 | 1.20865  |
| H | -0.57555 | -0.95066 | 2.10999  |
| H | -1.80086 | 0.13318  | 1.46065  |
| H | -1.96427 | -1.59785 | -1.29096 |
| H | -2.24529 | 0.11331  | -1.04033 |
| H | -0.99737 | -0.42246 | -2.16686 |
| C | 0.18226  | 3.29212  | -0.04158 |
| H | -1.33557 | 1.83725  | 0.37742  |
| H | -0.82562 | 1.86583  | -1.28771 |
| C | -0.32320 | 4.27888  | -1.09237 |
| C | -0.09199 | 3.84064  | 1.35801  |
| H | 1.26549  | 3.21743  | -0.16386 |

|   |          |          |          |
|---|----------|----------|----------|
| H | -0.06094 | 3.95050  | -2.09914 |
| H | -1.41140 | 4.36777  | -1.04357 |
| H | 0.09895  | 5.27329  | -0.93883 |
| H | 0.38887  | 4.81001  | 1.49877  |
| H | -1.16593 | 3.97827  | 1.50629  |
| H | 0.26818  | 3.17298  | 2.13871  |
| C | -0.18226 | -3.29212 | -0.04158 |
| H | 1.33557  | -1.83725 | 0.37742  |
| H | 0.82562  | -1.86583 | -1.28771 |
| C | 0.32320  | -4.27888 | -1.09237 |
| C | 0.09199  | -3.84064 | 1.35801  |
| H | -1.26549 | -3.21743 | -0.16386 |
| H | 0.06094  | -3.95050 | -2.09914 |
| H | 1.41140  | -4.36777 | -1.04357 |
| H | -0.09895 | -5.27329 | -0.93883 |
| H | -0.38887 | -4.81001 | 1.49877  |
| H | 1.16593  | -3.97827 | 1.50629  |
| H | -0.26818 | -3.17298 | 2.13871  |

Molecule 19

|   |          |          |          |
|---|----------|----------|----------|
| H | -2.23753 | -3.38410 | 0.00419  |
| H | 3.54775  | -0.30323 | 2.47670  |
| C | -2.17136 | -2.29405 | 0.00558  |
| C | 3.21920  | -0.18344 | 1.44230  |
| C | -1.16718 | 1.76431  | 1.23857  |
| C | -1.28184 | 1.79425  | -1.27796 |
| C | -3.36068 | 1.87281  | 0.05842  |
| H | -0.70964 | -0.15351 | 2.11594  |
| H | 1.61669  | -2.22315 | -0.55354 |
| H | -0.76692 | -0.10211 | -2.18851 |
| H | 1.19973  | 2.03910  | -0.05962 |

|   |          |          |          |
|---|----------|----------|----------|
| H | -4.43365 | 0.00639  | 0.04225  |
| H | 4.90603  | 0.35951  | -1.36241 |
| C | -1.18298 | 0.23105  | 1.21207  |
| C | 1.85100  | -1.22261 | -0.90766 |
| C | -1.22704 | 0.25489  | -1.26152 |
| C | 1.64274  | 1.20364  | -0.59522 |
| C | -3.39482 | 0.34960  | 0.02725  |
| C | 3.81673  | 0.27171  | -1.39164 |
| C | -2.79681 | -1.73386 | 1.27561  |
| C | 3.85200  | -1.27053 | 0.57235  |
| C | -2.85613 | -1.73021 | -1.23562 |
| C | 3.63964  | 1.19325  | 0.92481  |
| C | -0.70694 | -1.88984 | -0.05351 |
| C | 1.69110  | -0.28972 | 1.39741  |
| C | -2.70918 | -0.21349 | -1.23257 |
| C | 3.16788  | 1.34466  | -0.52146 |
| C | -2.66274 | -0.21824 | 1.25114  |
| C | 3.37804  | -1.09414 | -0.87221 |
| C | -0.46207 | -0.35813 | -0.04271 |
| C | 1.13800  | -0.14975 | -0.03909 |
| H | -2.29100 | -2.14596 | 2.15321  |
| H | 3.56744  | -2.25941 | 0.94166  |
| H | -2.40139 | -2.15490 | -2.13463 |
| H | 3.20024  | 1.97704  | 1.54778  |
| H | -3.85090 | -2.01509 | 1.34681  |
| H | 4.94209  | -1.20759 | 0.62378  |
| H | -3.91586 | -1.99869 | -1.25158 |
| H | 4.72545  | 1.30579  | 0.98146  |
| H | -0.29752 | -2.31336 | -0.96839 |
| H | 1.27872  | 0.49389  | 2.03465  |
| H | -0.17102 | -2.34909 | 0.78093  |
| H | 1.38112  | -1.24508 | 1.82795  |

|   |          |          |          |
|---|----------|----------|----------|
| H | -3.20136 | 0.19824  | -2.11831 |
| H | 3.43792  | 2.33521  | -0.89349 |
| H | -3.11030 | 0.20092  | 2.15744  |
| H | 3.80469  | -1.88233 | -1.49609 |
| H | -1.66892 | 2.10614  | 2.14839  |
| H | -0.15057 | 2.14923  | 1.28989  |
| H | -0.31430 | 2.24680  | -1.44510 |
| H | -1.90661 | 2.10012  | -2.12224 |
| H | -3.90645 | 2.28285  | -0.79537 |
| H | -3.85277 | 2.23717  | 0.96436  |
| C | -1.90358 | 2.32582  | 0.01579  |
| H | -1.85182 | 3.41622  | 0.02574  |
| H | 1.49471  | -1.15414 | -1.94004 |
| H | 1.34945  | 1.29301  | -1.64169 |
| H | 3.50855  | 0.39624  | -2.43305 |

Molecule 20

|   |          |          |          |
|---|----------|----------|----------|
| C | -1.47675 | 0.63523  | 1.00654  |
| C | -0.80847 | 0.15686  | -0.32841 |
| C | 0.80852  | -0.15741 | -0.32799 |
| C | 2.48852  | -1.63386 | -1.62227 |
| C | 1.03218  | -1.25226 | -1.40228 |
| C | 1.47657  | -0.63329 | 1.00796  |
| C | 1.68803  | 1.07790  | -0.74292 |
| C | 2.94370  | -1.07156 | 0.75012  |
| C | 3.15587  | 0.66073  | -0.99910 |
| C | 3.04491  | -2.16588 | -0.30537 |
| C | 3.26167  | -0.40459 | -2.08061 |
| C | 3.77467  | 0.14157  | 0.30261  |
| H | 2.53552  | -2.41214 | -2.38694 |
| H | 3.34088  | -1.44566 | 1.69836  |

|   |          |          |          |
|---|----------|----------|----------|
| H | 3.69676  | 1.55730  | -1.31760 |
| H | 0.49842  | -2.15840 | -1.12429 |
| H | 0.61088  | -0.91289 | -2.35156 |
| C | 1.54304  | 0.45152  | 2.09968  |
| H | 0.94859  | -1.50676 | 1.39121  |
| H | 1.32673  | 1.48709  | -1.68321 |
| C | 1.69665  | 2.18071  | 0.32315  |
| H | 4.08715  | -2.47499 | -0.42107 |
| H | 2.47890  | -3.04795 | 0.00690  |
| H | 2.84745  | -0.03404 | -3.02236 |
| H | 4.31152  | -0.64981 | -2.26215 |
| H | 4.80119  | -0.18399 | 0.10908  |
| C | 3.77515  | 1.24196  | 1.35532  |
| C | -2.94386 | 1.07295  | 0.74763  |
| C | -1.68786 | -1.07927 | -0.74113 |
| C | -1.03201 | 1.24967  | -1.40480 |
| C | -3.15568 | -0.66266 | -0.99834 |
| C | -2.48834 | 1.63078  | -1.62575 |
| C | -3.77470 | -0.14106 | 0.30229  |
| C | -3.04497 | 2.16527  | -0.30995 |
| C | -3.26136 | 0.40061  | -2.08188 |
| H | -3.34120 | 1.44883  | 1.69509  |
| H | -3.69647 | -1.55985 | -1.31522 |
| H | -2.53525 | 2.40760  | -2.39190 |
| C | -1.54337 | -0.44751 | 2.10029  |
| H | -0.94887 | 1.50944  | 1.38823  |
| H | -1.32638 | -1.49020 | -1.68059 |
| C | -1.69659 | -2.18005 | 0.32703  |
| H | -0.49833 | 2.15634  | -1.12843 |
| H | -0.61054 | 0.90851  | -2.35336 |
| H | -4.80121 | 0.18410  | 0.10799  |
| C | -3.77532 | -1.23946 | 1.35708  |

|   |          |          |          |
|---|----------|----------|----------|
| H | -2.47905 | 3.04796  | 0.00073  |
| H | -4.08720 | 2.47411  | -0.42640 |
| H | -4.31119 | 0.64543  | -2.26406 |
| H | -2.84696 | 0.02830  | -3.02286 |
| C | 2.33322  | 1.66415  | 1.61502  |
| H | 2.03006  | 0.02215  | 2.98018  |
| H | 0.56324  | 0.77799  | 2.42286  |
| H | 0.68785  | 2.53934  | 0.52823  |
| H | 2.26287  | 3.03709  | -0.05375 |
| H | 4.36944  | 2.09112  | 1.00688  |
| H | 4.23271  | 0.88284  | 2.28103  |
| H | 2.30467  | 2.44576  | 2.37668  |
| C | -2.33342 | -1.66109 | 1.61780  |
| H | -2.03055 | -0.01649 | 2.97989  |
| H | -0.56361 | -0.77333 | 2.42426  |
| H | -0.68778 | -2.53818 | 0.53297  |
| H | -2.26266 | -3.03721 | -0.04834 |
| H | -4.36952 | -2.08930 | 1.01016  |
| H | -4.23302 | -0.87860 | 2.28204  |
| H | -2.30498 | -2.44127 | 2.38094  |

Molecule 21

|   |          |          |          |
|---|----------|----------|----------|
| C | 1.90249  | -0.68451 | -1.14636 |
| C | 1.34482  | 0.03515  | 0.10974  |
| C | -0.30382 | 0.03013  | 0.26657  |
| C | -2.20644 | -1.27505 | 1.44313  |
| C | -0.72190 | -1.26315 | 1.05248  |
| C | -1.20664 | 0.00346  | -1.03545 |
| C | -0.78092 | 1.30943  | 1.05165  |
| C | -2.72082 | -0.04810 | -0.61578 |
| C | -2.26642 | 1.19802  | 1.46047  |



|   |          |          |          |
|---|----------|----------|----------|
| C | -3.05251 | -1.31393 | 0.16986  |
| C | -2.53818 | -0.05194 | 2.28095  |
| C | -3.13015 | 1.17931  | 0.18823  |
| H | -2.38871 | -2.18127 | 2.02869  |
| H | -3.29123 | -0.05487 | -1.55167 |
| H | -2.51436 | 2.08211  | 2.05421  |
| C | -0.45518 | -2.53808 | 0.23941  |
| H | -0.17272 | -1.30716 | 1.98959  |
| C | -1.02580 | 1.29139  | -1.84849 |
| C | -1.01839 | -1.26449 | -1.88434 |
| H | -0.18550 | 1.39744  | 1.96568  |
| C | -0.70227 | 2.63413  | 0.25979  |
| H | -4.11379 | -1.29342 | 0.43564  |
| C | -2.75556 | -2.55725 | -0.65880 |
| H | -1.92829 | -0.04494 | 3.18879  |
| H | -3.58525 | -0.07649 | 2.59510  |
| H | -4.18117 | 1.07959  | 0.47609  |
| C | -2.95358 | 2.41580  | -0.68231 |
| C | 3.43622  | -0.72927 | -1.17982 |
| C | 1.98958  | -0.63004 | 1.35817  |
| C | 1.98551  | 1.44829  | 0.04989  |
| C | 3.52067  | -0.65313 | 1.30771  |
| C | 3.51859  | 1.43935  | -0.00383 |
| C | 3.96691  | -1.43280 | 0.06964  |
| C | 3.99258  | 0.68951  | -1.24463 |
| C | 4.07171  | 0.76769  | 1.24908  |
| H | 3.73793  | -1.28601 | -2.06954 |
| H | 3.88403  | -1.15481 | 2.20709  |
| H | 3.85655  | 2.47705  | -0.04675 |
| H | 1.54577  | -1.70564 | -1.21754 |
| H | 1.56038  | -0.16436 | -2.04187 |
| H | 1.66554  | -0.09951 | 2.25811  |

|   |          |          |          |
|---|----------|----------|----------|
| H | 1.66661  | -1.66192 | 1.46403  |
| H | 1.63077  | 1.97973  | -0.83130 |
| H | 1.70117  | 2.02169  | 0.92980  |
| H | 5.05754  | -1.49578 | 0.03306  |
| H | 3.58563  | -2.45668 | 0.11503  |
| H | 3.63683  | 1.19151  | -2.14831 |
| H | 5.08470  | 0.67427  | -1.28978 |
| H | 5.16460  | 0.75597  | 1.22749  |
| H | 3.77014  | 1.32477  | 2.14005  |
| C | -1.47813 | 2.52561  | -1.05117 |
| H | -1.61845 | 1.21749  | -2.76600 |
| H | 0.01383  | 1.40437  | -2.16077 |
| H | 0.30170  | 2.97453  | 0.07091  |
| H | -1.16299 | 3.41091  | 0.87691  |
| H | -3.27040 | 3.31674  | -0.15096 |
| H | -3.57970 | 2.32637  | -1.57436 |
| H | -1.30927 | 3.42162  | -1.65178 |
| C | -1.28049 | -2.52946 | -1.05276 |
| H | -0.75313 | -3.40131 | 0.84154  |
| H | 0.60066  | -2.67425 | 0.02922  |
| H | -0.04736 | -1.30305 | -2.36034 |
| H | -1.74652 | -1.22853 | -2.70120 |
| H | -3.38877 | -2.57132 | -1.54973 |
| H | -2.98088 | -3.45992 | -0.08457 |
| H | -1.03736 | -3.41137 | -1.64868 |

Molecule 22

|   |          |          |          |
|---|----------|----------|----------|
| C | -1.89239 | -1.02529 | 0.72477  |
| C | -1.03120 | 0.18720  | 0.17801  |
| C | 0.61952  | -0.02950 | -0.12227 |
| C | 2.43728  | 0.57864  | -1.86121 |

|   |          |          |          |
|---|----------|----------|----------|
| C | 1.01618  | 0.86821  | -1.34719 |
| C | 0.96157  | -1.53375 | -0.41254 |
| C | 1.69284  | 0.38023  | 0.99902  |
| C | 2.38482  | -1.72896 | -0.96542 |
| C | 3.14691  | 0.12328  | 0.44170  |
| C | 2.59713  | -0.89101 | -2.21632 |
| C | 3.44817  | 0.98011  | -0.78607 |
| C | 3.39586  | -1.34159 | 0.11631  |
| H | 2.59555  | 1.18994  | -2.75479 |
| H | 2.49964  | -2.78862 | -1.21188 |
| H | 3.82644  | 0.41528  | 1.25000  |
| H | 0.35336  | 0.65950  | -2.18240 |
| C | 0.95250  | 2.37039  | -1.02196 |
| C | 0.86347  | -2.44016 | 0.82882  |
| H | 0.29182  | -1.89834 | -1.18505 |
| C | 1.73923  | 1.88113  | 1.34783  |
| C | 1.55518  | -0.50591 | 2.24417  |
| H | 3.59164  | -1.07357 | -2.63233 |
| H | 1.86979  | -1.17330 | -2.98308 |
| C | 3.35064  | 2.46209  | -0.45124 |
| H | 4.45933  | 0.74803  | -1.13401 |
| H | 4.41050  | -1.45053 | -0.27881 |
| C | 3.24710  | -2.16726 | 1.38620  |
| C | -3.34362 | -0.57063 | 1.06423  |
| C | -1.82051 | 0.58965  | -1.12072 |
| C | -1.20203 | 1.31679  | 1.22126  |
| C | -3.25931 | 1.05514  | -0.78704 |
| C | -2.63555 | 1.73918  | 1.50881  |
| C | -4.06070 | -0.11842 | -0.21607 |
| C | -3.38598 | 0.55179  | 2.08772  |
| C | -3.27113 | 2.21009  | 0.20567  |
| H | -3.85736 | -1.44663 | 1.47020  |

|   |          |          |          |
|---|----------|----------|----------|
| H | -3.71893 | 1.37852  | -1.72609 |
| H | -2.61369 | 2.55940  | 2.22978  |
| C | -2.08418 | -2.20482 | -0.24856 |
| H | -1.46324 | -1.37188 | 1.66427  |
| H | -1.34364 | 1.43583  | -1.60581 |
| C | -1.92667 | -0.56331 | -2.13023 |
| H | -0.74571 | 1.00483  | 2.15918  |
| H | -0.67997 | 2.20341  | 0.89343  |
| H | -5.06704 | 0.22443  | 0.04261  |
| C | -4.14968 | -1.24709 | -1.23421 |
| H | -2.91601 | 0.23453  | 3.02263  |
| H | -4.42312 | 0.81105  | 2.31690  |
| H | -4.29775 | 2.54651  | 0.37279  |
| H | -2.71308 | 3.06178  | -0.19362 |
| C | 1.82956  | -1.97858 | 1.91359  |
| H | 1.11750  | -3.46003 | 0.52466  |
| H | -0.13305 | -2.49011 | 1.23913  |
| H | 0.55922  | -0.41189 | 2.67990  |
| H | 2.26297  | -0.16124 | 3.00480  |
| H | 3.98628  | -1.84286 | 2.12375  |
| H | 3.43060  | -3.22594 | 1.18508  |
| H | 1.68362  | -2.58091 | 2.81252  |
| C | -2.73528 | -1.72427 | -1.54631 |
| H | -2.74020 | -2.93537 | 0.23338  |
| H | -1.16870 | -2.73445 | -0.47005 |
| H | -0.94182 | -0.90988 | -2.43989 |
| H | -2.42080 | -0.19414 | -3.03352 |
| H | -4.64715 | -0.89435 | -2.14182 |
| H | -4.74622 | -2.07168 | -0.83531 |
| H | -2.76824 | -2.54589 | -2.26435 |
| C | 1.94812  | 2.73337  | 0.08592  |
| H | -0.05190 | 2.69136  | -0.76576 |

|   |         |         |          |
|---|---------|---------|----------|
| H | 1.21840 | 2.92632 | -1.92583 |
| H | 2.59865 | 2.03220 | 2.00863  |
| H | 0.88297 | 2.21390 | 1.91764  |
| H | 3.54482 | 3.06707 | -1.34097 |
| H | 4.10441 | 2.72726 | 0.29453  |
| H | 1.84304 | 3.79006 | 0.33950  |

Molecule 23

|   |          |          |          |
|---|----------|----------|----------|
| C | 1.90126  | 0.28489  | 1.02672  |
| C | 0.89897  | -0.08929 | -0.16136 |
| C | -0.89900 | -0.08733 | 0.16043  |
| C | -2.77583 | 0.74649  | 1.76756  |
| C | -1.30604 | 0.91550  | 1.30716  |
| C | -1.39745 | -1.54036 | 0.55751  |
| C | -1.90152 | 0.28774  | -1.02731 |
| C | -2.86291 | -1.59668 | 1.04181  |
| C | -3.40281 | 0.17419  | -0.53321 |
| C | -3.07632 | -0.66720 | 2.21836  |
| C | -3.71135 | 1.13129  | 0.61198  |
| C | -3.78974 | -1.23257 | -0.12057 |
| H | -2.92802 | 1.43376  | 2.60396  |
| H | -3.05168 | -2.62652 | 1.35675  |
| H | -4.00845 | 0.45815  | -1.40099 |
| H | -0.67868 | 0.73149  | 2.17908  |
| C | -1.23621 | 2.40343  | 0.93031  |
| C | -1.37240 | -2.59431 | -0.57610 |
| H | -0.81659 | -1.86826 | 1.41245  |
| C | -1.82186 | 1.74990  | -1.48157 |
| C | -1.76909 | -0.70690 | -2.18834 |
| H | -4.10260 | -0.74047 | 2.58859  |
| H | -2.41373 | -0.94989 | 3.04146  |

|   |          |          |          |
|---|----------|----------|----------|
| C | -3.53647 | 2.56591  | 0.14003  |
| H | -4.74715 | 0.97410  | 0.92749  |
| H | -4.82704 | -1.22953 | 0.22752  |
| C | -3.65556 | -2.14878 | -1.32702 |
| C | 3.40279  | 0.16916  | 0.53376  |
| C | 1.30827  | 0.91233  | -1.30836 |
| C | 1.39550  | -1.54350 | -0.55720 |
| C | 2.77815  | 0.74096  | -1.76763 |
| C | 2.86120  | -1.60193 | -1.04068 |
| C | 3.71329  | 1.12530  | -0.61157 |
| C | 3.78806  | -1.23828 | 0.12191  |
| C | 3.07673  | -0.67343 | -2.21757 |
| H | 4.00823  | 0.45269  | 1.40181  |
| H | 2.93188  | 1.42748  | -2.60435 |
| H | 3.04879  | -2.63220 | -1.35491 |
| C | 1.82226  | 1.74730  | 1.48023  |
| C | 1.76676  | -0.70903 | 2.18814  |
| H | 0.68146  | 0.72861  | -2.18072 |
| C | 1.24028  | 2.40062  | -0.93259 |
| C | 1.36932  | -2.59696 | 0.57687  |
| H | 0.81439  | -1.87143 | -1.41202 |
| H | 4.74917  | 0.96677  | -0.92618 |
| C | 3.53975  | 2.56036  | -0.14035 |
| C | 3.65230  | -2.15356 | 1.32885  |
| H | 4.82552  | -1.23671 | -0.22573 |
| H | 4.10313  | -0.74845 | -2.58712 |
| H | 2.41423  | -0.95554 | -3.04094 |
| C | -2.19801 | -2.12213 | -1.76853 |
| H | -1.82145 | -3.50837 | -0.17760 |
| H | -0.39377 | -2.88638 | -0.90626 |
| H | -0.74462 | -0.72584 | -2.56358 |
| H | -2.39844 | -0.37013 | -3.01828 |

|   |          |          |          |
|---|----------|----------|----------|
| H | -4.32087 | -1.80168 | -2.12249 |
| H | -3.94802 | -3.17239 | -1.08011 |
| H | -2.04870 | -2.80374 | -2.60832 |
| C | 2.09101  | 2.71160  | 0.30543  |
| H | 2.60314  | 1.90397  | 2.23084  |
| H | 0.89311  | 1.96534  | 1.98890  |
| H | 0.23929  | 2.76228  | -0.82556 |
| H | 1.65011  | 2.96646  | -1.77396 |
| H | 3.76599  | 3.26658  | -0.94292 |
| H | 4.23198  | 2.76373  | 0.68093  |
| H | 1.90002  | 3.73686  | 0.63081  |
| C | -2.08797 | 2.71498  | -0.30683 |
| H | -0.23470 | 2.76353  | 0.82179  |
| H | -1.64416 | 2.97022  | 1.77198  |
| H | -2.60376 | 1.90680  | -2.23109 |
| H | -0.89342 | 1.96694  | -1.99185 |
| H | -3.76122 | 3.27291  | 0.94236  |
| H | -4.22909 | 2.76976  | -0.68079 |
| H | -1.89577 | 3.73982  | -0.63289 |
| C | 2.19460  | -2.12495 | 1.76952  |
| H | 0.74193  | -0.72668 | 2.56246  |
| H | 2.39569  | -0.37238 | 3.01846  |
| H | 1.81810  | -3.51138 | 0.17887  |
| H | 0.39052  | -2.88844 | 0.90669  |
| H | 4.31758  | -1.80674 | 2.12446  |
| H | 3.94369  | -3.17765 | 1.08269  |
| H | 2.04408  | -2.80598 | 2.60957  |

Molecule 24

|   |          |          |         |
|---|----------|----------|---------|
| C | -1.88216 | -1.36819 | 0.24108 |
| C | -1.39416 | 0.13465  | 0.35043 |

|   |          |          |          |
|---|----------|----------|----------|
| C | 0.29971  | 0.47500  | 0.22809  |
| C | 2.60912  | -0.36957 | 1.08774  |
| C | 1.11481  | -0.72677 | 0.82664  |
| C | 0.59400  | 1.77604  | 1.07607  |
| C | 1.01016  | 0.78967  | -1.15775 |
| C | 2.08730  | 2.05199  | 1.28800  |
| C | 2.53126  | 1.10957  | -0.90968 |
| C | 2.73294  | 0.86201  | 1.96966  |
| C | 3.26166  | -0.06289 | -0.27436 |
| C | 2.73715  | 2.35318  | -0.05725 |
| C | 3.33662  | -1.55133 | 1.73479  |
| H | 2.16490  | 2.92990  | 1.93702  |
| H | 2.95890  | 1.28937  | -1.90258 |
| H | 0.67395  | -1.00501 | 1.79032  |
| C | 1.12489  | -1.97274 | -0.08532 |
| C | -0.01479 | 3.03380  | 0.44648  |
| H | 0.21677  | 1.65104  | 2.08168  |
| C | 1.05159  | -0.42459 | -2.09213 |
| C | 0.44809  | 2.05791  | -1.82300 |
| H | 3.79012  | 1.06122  | 2.17096  |
| H | 2.25199  | 0.67628  | 2.93565  |
| C | 3.23609  | -1.28954 | -1.18042 |
| H | 4.30432  | 0.22740  | -0.09765 |
| H | 3.81048  | 2.51925  | 0.07565  |
| C | 2.10410  | 3.56963  | -0.71915 |
| C | -3.34702 | -1.52981 | 0.74709  |
| C | -2.39520 | 0.86488  | -0.62080 |
| C | -1.73498 | 0.57972  | 1.80393  |
| C | -3.85855 | 0.73342  | -0.10061 |
| C | -3.17374 | 0.39304  | 2.25202  |
| C | -4.30126 | -0.73574 | -0.15643 |
| C | -3.53103 | -1.07988 | 2.18446  |



|   |          |          |          |
|---|----------|----------|----------|
| C | -4.04423 | 1.23476  | 1.32534  |
| H | -3.58674 | -2.59413 | 0.66858  |
| H | -4.48777 | 1.32123  | -0.77548 |
| H | -3.26201 | 0.75785  | 3.27776  |
| C | -1.91097 | -1.95422 | -1.18413 |
| H | -1.27216 | -1.99168 | 0.89455  |
| H | -2.17337 | 1.92721  | -0.66653 |
| C | -2.41045 | 0.31229  | -2.05600 |
| H | -1.07427 | 0.05733  | 2.49971  |
| H | -1.54851 | 1.64033  | 1.91461  |
| H | -5.31610 | -0.81428 | 0.24469  |
| C | -4.27210 | -1.26732 | -1.57998 |
| H | -2.88026 | -1.65064 | 2.85262  |
| H | -4.56150 | -1.25625 | 2.50403  |
| H | -5.09879 | 1.16593  | 1.60464  |
| H | -3.75673 | 2.28671  | 1.40558  |
| C | 0.61851  | 3.28783  | -0.92321 |
| H | 0.18943  | 3.88579  | 1.10144  |
| H | -1.09562 | 2.96847  | 0.36657  |
| H | -0.59637 | 1.95260  | -2.08638 |
| H | 0.98617  | 2.22137  | -2.76241 |
| H | 2.58973  | 3.76639  | -1.67867 |
| H | 2.24149  | 4.45771  | -0.09639 |
| H | 0.13903  | 4.14650  | -1.39744 |
| C | -2.84333 | -1.15091 | -2.08825 |
| H | -2.25926 | -2.98909 | -1.11971 |
| H | -0.93323 | -1.99768 | -1.64278 |
| H | -1.44449 | 0.40821  | -2.53464 |
| H | -3.10604 | 0.91497  | -2.64736 |
| H | -4.95344 | -0.69339 | -2.21382 |
| H | -4.60380 | -2.30883 | -1.60208 |
| H | -2.77357 | -1.52964 | -3.10999 |

|   |         |          |          |
|---|---------|----------|----------|
| C | 1.76283 | -1.61710 | -1.43546 |
| H | 0.12261 | -2.30950 | -0.26137 |
| C | 1.85400 | -3.14270 | 0.57585  |
| H | 1.59509 | -0.14217 | -2.99959 |
| H | 0.06004 | -0.71154 | -2.41984 |
| C | 3.96988 | -2.45217 | -0.51377 |
| H | 3.72444 | -1.04165 | -2.12763 |
| H | 1.69082 | -2.48452 | -2.09926 |
| C | 3.30985 | -2.77858 | 0.82814  |
| H | 2.87341 | -1.78490 | 2.69866  |
| H | 4.36975 | -1.25486 | 1.94125  |
| H | 1.78679 | -4.02178 | -0.07124 |
| H | 1.35669 | -3.39830 | 1.51608  |
| H | 5.01959 | -2.18539 | -0.36342 |
| H | 3.95068 | -3.33215 | -1.16243 |
| H | 3.83336 | -3.60779 | 1.30786  |

Molecule 25

|   |         |          |          |
|---|---------|----------|----------|
| C | 0.00000 | 0.82114  | 1.37722  |
| C | 0.00000 | 0.82114  | -1.37722 |
| C | 0.00000 | -0.82114 | 1.37722  |
| C | 0.00000 | -0.82114 | -1.37722 |
| C | 0.00000 | 0.76657  | 2.91810  |
| C | 0.00000 | 0.76657  | -2.91810 |
| C | 0.00000 | -0.76657 | 2.91810  |
| C | 0.00000 | -0.76657 | -2.91810 |
| C | 1.22093 | 1.40821  | -0.70069 |
| C | 1.22093 | 1.40821  | 0.70069  |
| C | 2.31770 | 1.91252  | -1.37748 |
| C | 2.31770 | 1.91252  | 1.37748  |
| C | 3.41184 | 2.41909  | -0.68972 |

|   |          |          |          |
|---|----------|----------|----------|
| C | 3.41184  | 2.41909  | 0.68972  |
| H | 2.34217  | 1.91910  | -2.45660 |
| H | 2.34217  | 1.91910  | 2.45660  |
| H | 4.25827  | 2.80907  | -1.23836 |
| H | 4.25827  | 2.80907  | 1.23836  |
| C | -1.22093 | 1.40821  | 0.70069  |
| C | -1.22093 | 1.40821  | -0.70069 |
| C | -2.31770 | 1.91252  | 1.37748  |
| C | -2.31770 | 1.91252  | -1.37748 |
| C | -3.41184 | 2.41909  | 0.68972  |
| C | -3.41184 | 2.41909  | -0.68972 |
| H | -2.34217 | 1.91910  | 2.45660  |
| H | -2.34217 | 1.91910  | -2.45660 |
| H | -4.25827 | 2.80907  | 1.23836  |
| H | -4.25827 | 2.80907  | -1.23836 |
| C | 1.22093  | -1.40821 | 0.70069  |
| C | 1.22093  | -1.40821 | -0.70069 |
| C | 2.31770  | -1.91252 | 1.37748  |
| C | 2.31770  | -1.91252 | -1.37748 |
| C | 3.41184  | -2.41909 | 0.68972  |
| C | 3.41184  | -2.41909 | -0.68972 |
| H | 2.34217  | -1.91910 | 2.45660  |
| H | 2.34217  | -1.91910 | -2.45660 |
| H | 4.25827  | -2.80907 | 1.23836  |
| H | 4.25827  | -2.80907 | -1.23836 |
| C | -1.22093 | -1.40821 | -0.70069 |
| C | -1.22093 | -1.40821 | 0.70069  |
| C | -2.31770 | -1.91252 | -1.37748 |
| C | -2.31770 | -1.91252 | 1.37748  |
| C | -3.41184 | -2.41909 | -0.68972 |
| C | -3.41184 | -2.41909 | 0.68972  |
| H | -2.34217 | -1.91910 | -2.45660 |

|   |          |          |          |
|---|----------|----------|----------|
| H | -2.34217 | -1.91910 | 2.45660  |
| H | -4.25827 | -2.80907 | -1.23836 |
| H | -4.25827 | -2.80907 | 1.23836  |
| H | 0.87130  | 1.20898  | 3.38822  |
| H | -0.87130 | 1.20898  | 3.38822  |
| H | -0.87130 | 1.20898  | -3.38822 |
| H | 0.87130  | 1.20898  | -3.38822 |
| H | -0.87130 | -1.20898 | 3.38822  |
| H | 0.87130  | -1.20898 | 3.38822  |
| H | 0.87130  | -1.20898 | -3.38822 |
| H | -0.87130 | -1.20898 | -3.38822 |

Molecule 26

|   |          |          |          |
|---|----------|----------|----------|
| C | -3.26758 | -0.11859 | -0.00084 |
| C | -1.89505 | -0.06933 | -0.00076 |
| C | -4.00258 | -0.22921 | 1.17860  |
| C | -1.16634 | -0.09709 | 1.17951  |
| C | -3.29690 | -0.29354 | 2.35573  |
| C | -1.86920 | -0.23031 | 2.35282  |
| C | -1.16998 | 0.01105  | -1.18088 |
| C | -4.00849 | -0.06073 | -1.18033 |
| C | -1.88052 | 0.09344  | -2.35429 |
| C | -3.30910 | 0.05407  | -2.35735 |
| C | -5.46795 | -0.25556 | 0.78395  |
| C | -5.47202 | -0.13922 | -0.78576 |
| C | 0.32538  | -0.01923 | 0.85796  |
| C | 0.32343  | 0.04157  | -0.85883 |
| H | -3.80187 | -0.39258 | 3.30811  |
| H | -1.34890 | -0.29271 | 3.30020  |
| H | -1.36601 | 0.19334  | -3.30162 |
| H | -3.81978 | 0.11688  | -3.30977 |

|   |          |          |          |
|---|----------|----------|----------|
| H | -6.01739 | 0.56868  | 1.23881  |
| H | -5.95066 | -1.17719 | 1.10911  |
| H | -5.96117 | -1.00058 | -1.24066 |
| H | -6.01935 | 0.74557  | -1.11091 |
| C | 0.95396  | -1.30693 | 1.42022  |
| C | 0.35664  | -2.53135 | 1.10875  |
| C | 2.05240  | -1.32779 | 2.26970  |
| C | 0.86631  | -3.72473 | 1.57818  |
| C | 2.56440  | -2.52646 | 2.75265  |
| C | 1.98483  | -3.73036 | 2.40095  |
| H | -0.51954 | -2.55136 | 0.47639  |
| H | 2.52257  | -0.40755 | 2.57776  |
| H | 0.38794  | -4.65456 | 1.30211  |
| H | 3.42173  | -2.50773 | 3.41218  |
| H | 2.38864  | -4.66306 | 2.77065  |
| C | 0.96393  | 1.24326  | 1.44090  |
| C | 2.30156  | 1.55092  | 1.18626  |
| C | 0.23862  | 2.14924  | 2.20342  |
| C | 2.88589  | 2.70711  | 1.66507  |
| C | 0.81869  | 3.31343  | 2.69080  |
| C | 2.14366  | 3.60101  | 2.42352  |
| H | 2.89980  | 0.88718  | 0.58272  |
| H | -0.80413 | 1.96396  | 2.41086  |
| H | 3.92192  | 2.91568  | 1.43560  |
| H | 0.22079  | 3.99890  | 3.27635  |
| H | 2.59462  | 4.51096  | 2.79514  |
| C | 0.85755  | 1.37182  | -1.41976 |
| C | 0.17182  | 2.54938  | -1.10960 |
| C | 1.95441  | 1.47314  | -2.26551 |
| C | 0.59512  | 3.77703  | -1.57648 |
| C | 2.37961  | 2.70623  | -2.74596 |
| C | 1.71306  | 3.86458  | -2.39536 |

|   |          |          |          |
|---|----------|----------|----------|
| H | -0.70612 | 2.50527  | -0.48094 |
| H | 2.49133  | 0.58982  | -2.57247 |
| H | 0.04949  | 4.66943  | -1.30161 |
| H | 3.23829  | 2.75037  | -3.40253 |
| H | 2.04948  | 4.82447  | -2.76295 |
| C | 1.05277  | -1.17069 | -1.44185 |
| C | 2.40839  | -1.38128 | -1.18372 |
| C | 0.39717  | -2.12522 | -2.20830 |
| C | 3.07634  | -2.49111 | -1.66286 |
| C | 1.06149  | -3.24334 | -2.69605 |
| C | 2.40303  | -3.43480 | -2.42530 |
| H | 2.95510  | -0.67743 | -0.57672 |
| H | -0.65561 | -2.01566 | -2.41882 |
| H | 4.12404  | -2.62465 | -1.43046 |
| H | 0.51647  | -3.96910 | -3.28467 |
| H | 2.91979  | -4.30894 | -2.79720 |

Molecule 27

|   |          |          |          |
|---|----------|----------|----------|
| C | 0.81900  | 0.10540  | 0.00000  |
| C | -0.81900 | -0.10540 | 0.00000  |
| O | 1.50793  | -1.05622 | 0.00000  |
| O | -1.50793 | 1.05622  | 0.00000  |
| N | 0.53644  | 2.15368  | -1.37508 |
| N | 1.69443  | 0.59971  | -2.37597 |
| C | 1.06854  | 0.95419  | -1.23578 |
| C | 0.82383  | 2.60539  | -2.64002 |
| C | 1.54141  | 1.63868  | -3.27753 |
| C | 0.37256  | 3.93901  | -3.11852 |
| C | 2.11790  | 1.58917  | -4.64645 |
| C | 2.37017  | -0.64503 | -2.70396 |
| N | 1.69443  | 0.59971  | 2.37597  |

|    |          |          |          |
|----|----------|----------|----------|
| N  | 0.53644  | 2.15368  | 1.37508  |
| C  | 1.06854  | 0.95419  | 1.23578  |
| C  | 1.54141  | 1.63868  | 3.27753  |
| C  | 0.82383  | 2.60539  | 2.64002  |
| C  | 2.11790  | 1.58917  | 4.64645  |
| C  | 0.37256  | 3.93901  | 3.11852  |
| C  | 2.37017  | -0.64503 | 2.70396  |
| N  | -0.53644 | -2.15368 | -1.37508 |
| N  | -1.69443 | -0.59971 | -2.37597 |
| C  | -1.06854 | -0.95419 | -1.23578 |
| C  | -0.82383 | -2.60539 | -2.64002 |
| C  | -1.54141 | -1.63868 | -3.27753 |
| C  | -0.37256 | -3.93901 | -3.11852 |
| C  | -2.11790 | -1.58917 | -4.64645 |
| C  | -2.37017 | 0.64503  | -2.70396 |
| N  | -1.69443 | -0.59971 | 2.37597  |
| N  | -0.53644 | -2.15368 | 1.37508  |
| C  | -1.06854 | -0.95419 | 1.23578  |
| C  | -1.54141 | -1.63868 | 3.27753  |
| C  | -0.82383 | -2.60539 | 2.64002  |
| C  | -2.11790 | -1.58917 | 4.64645  |
| C  | -0.37256 | -3.93901 | 3.11852  |
| C  | -2.37017 | 0.64503  | 2.70396  |
| Fe | 0.65942  | -2.79365 | 0.00000  |
| Cl | 1.11265  | -4.95995 | 0.00000  |
| Fe | -0.65942 | 2.79365  | 0.00000  |
| Cl | -1.11265 | 4.95995  | 0.00000  |
| H  | 0.71955  | 4.12762  | -4.13256 |
| H  | -0.71550 | 4.01461  | -3.10548 |
| H  | 0.74401  | 4.72867  | -2.46653 |
| H  | 1.77178  | 0.71432  | -5.19967 |
| H  | 1.82141  | 2.47469  | -5.20316 |

|   |          |          |          |
|---|----------|----------|----------|
| H | 3.20914  | 1.55899  | -4.62901 |
| H | 2.61944  | -1.15772 | -1.78522 |
| H | 1.71389  | -1.27664 | -3.30370 |
| H | 3.27115  | -0.42178 | -3.27067 |
| H | 1.77178  | 0.71432  | 5.19967  |
| H | 3.20914  | 1.55899  | 4.62901  |
| H | 1.82141  | 2.47469  | 5.20316  |
| H | 0.71955  | 4.12762  | 4.13256  |
| H | 0.74401  | 4.72867  | 2.46653  |
| H | -0.71550 | 4.01461  | 3.10548  |
| H | 2.61944  | -1.15772 | 1.78522  |
| H | 3.27115  | -0.42178 | 3.27067  |
| H | 1.71389  | -1.27664 | 3.30370  |
| H | -0.71955 | -4.12762 | -4.13256 |
| H | 0.71550  | -4.01461 | -3.10548 |
| H | -0.74401 | -4.72867 | -2.46653 |
| H | -1.77178 | -0.71432 | -5.19967 |
| H | -1.82141 | -2.47469 | -5.20316 |
| H | -3.20914 | -1.55899 | -4.62901 |
| H | -2.61944 | 1.15772  | -1.78522 |
| H | -1.71389 | 1.27664  | -3.30370 |
| H | -3.27115 | 0.42178  | -3.27067 |
| H | -1.77178 | -0.71432 | 5.19967  |
| H | -3.20914 | -1.55899 | 4.62901  |
| H | -1.82141 | -2.47469 | 5.20316  |
| H | -0.71955 | -4.12762 | 4.13256  |
| H | -0.74401 | -4.72867 | 2.46653  |
| H | 0.71550  | -4.01461 | 3.10548  |
| H | -2.61944 | 1.15772  | 1.78522  |
| H | -3.27115 | 0.42178  | 3.27067  |
| H | -1.71389 | 1.27664  | 3.30370  |



Molecule 28

|    |          |          |          |
|----|----------|----------|----------|
| C  | 0.00000  | 0.00000  | 1.76608  |
| C  | 0.00000  | 0.00000  | 0.25452  |
| H  | 0.00626  | -1.02610 | 2.12701  |
| Cl | -0.01024 | 1.67644  | -0.36284 |
| H  | -0.89176 | 0.50762  | 2.12701  |
| H  | 0.88549  | 0.51848  | 2.12701  |
| Cl | -1.44672 | -0.84709 | -0.36284 |
| Cl | 1.45696  | -0.82936 | -0.36284 |

Molecule 29

|    |          |          |          |
|----|----------|----------|----------|
| C  | 0.00000  | 0.00000  | 0.79129  |
| C  | 0.00000  | 0.00000  | -0.79129 |
| Cl | -0.73621 | 1.49659  | 1.39544  |
| Cl | 0.73621  | -1.49659 | -1.39544 |
| Cl | 1.66419  | -0.11072 | 1.39544  |
| Cl | -0.92798 | -1.38587 | 1.39544  |
| Cl | 0.92798  | 1.38587  | -1.39544 |
| Cl | -1.66419 | 0.11072  | -1.39544 |

Molecule 30a

|   |          |          |          |
|---|----------|----------|----------|
| C | 0.00000  | 0.00000  | 0.96757  |
| C | 0.00000  | 0.00000  | -0.96757 |
| H | 0.50580  | 0.94747  | 1.11920  |
| H | -0.50580 | -0.94747 | -1.11920 |
| H | 0.56763  | -0.91178 | 1.11920  |
| H | -1.07344 | -0.03569 | 1.11920  |
| H | 1.07344  | 0.03569  | -1.11920 |
| H | -0.56763 | 0.91178  | -1.11920 |

Molecule 30b

|   |          |          |          |
|---|----------|----------|----------|
| C | 0.00000  | 0.79554  | 0.00000  |
| C | 0.00000  | -0.79554 | 0.00000  |
| H | 1.12765  | 0.65953  | 0.02337  |
| H | -1.12765 | -0.65953 | -0.02337 |
| H | -0.36356 | 1.25612  | 0.91085  |
| H | -0.32551 | 1.25612  | -0.92513 |
| H | 0.32551  | -1.25612 | 0.92513  |
| H | 0.36356  | -1.25612 | -0.91085 |

Molecule 31

|   |          |          |          |
|---|----------|----------|----------|
| C | 0.00000  | 0.96499  | -0.15369 |
| C | 0.00000  | -0.96499 | -0.15369 |
| B | -1.35450 | 0.00000  | 0.26231  |
| B | -0.88232 | 1.45269  | 1.18859  |
| B | 0.88232  | 1.45269  | 1.18859  |
| B | 1.35450  | 0.00000  | 0.26231  |
| B | -0.88232 | -1.45269 | 1.18859  |
| B | -1.43195 | 0.00000  | 2.03010  |
| B | 0.00000  | 0.88016  | 2.61431  |
| B | 1.43195  | 0.00000  | 2.03010  |
| B | 0.88232  | -1.45269 | 1.18859  |
| B | 0.00000  | -0.88016 | 2.61431  |
| H | -2.29328 | 0.00000  | -0.44820 |
| H | -1.52783 | 2.43577  | 1.06266  |
| H | 1.52783  | 2.43577  | 1.06266  |
| H | 2.29328  | 0.00000  | -0.44820 |
| H | -1.52783 | -2.43577 | 1.06266  |
| H | -2.47533 | 0.00000  | 2.59033  |

|   |          |          |          |
|---|----------|----------|----------|
| H | 0.00000  | 1.51879  | 3.61201  |
| H | 2.47533  | 0.00000  | 2.59033  |
| H | 1.52783  | -2.43577 | 1.06266  |
| H | 0.00000  | -1.51879 | 3.61201  |
| N | 0.00000  | 1.57347  | -1.39849 |
| N | 0.00000  | -1.57347 | -1.39849 |
| C | -1.20192 | 2.27055  | -1.82473 |
| H | -1.28026 | 3.26184  | -1.36328 |
| H | -1.16572 | 2.39377  | -2.90621 |
| H | -2.09052 | 1.70207  | -1.57577 |
| C | 1.20192  | 2.27055  | -1.82473 |
| H | 1.16572  | 2.39377  | -2.90621 |
| H | 1.28026  | 3.26184  | -1.36328 |
| H | 2.09052  | 1.70207  | -1.57577 |
| C | 1.20192  | -2.27055 | -1.82473 |
| H | 1.28026  | -3.26184 | -1.36328 |
| H | 1.16572  | -2.39377 | -2.90621 |
| H | 2.09052  | -1.70207 | -1.57577 |
| C | -1.20192 | -2.27055 | -1.82473 |
| H | -1.16572 | -2.39377 | -2.90621 |
| H | -1.28026 | -3.26184 | -1.36328 |
| H | -2.09052 | -1.70207 | -1.57577 |

Molecule 32

|   |          |          |         |
|---|----------|----------|---------|
| C | 1.28406  | 0.15062  | 0.00000 |
| C | 0.00000  | 0.47238  | 0.00000 |
| H | 1.60713  | -0.88396 | 0.00000 |
| H | -0.27557 | 1.52264  | 0.00000 |
| H | 2.05663  | 0.90758  | 0.00000 |
| C | -1.13148 | -0.50430 | 0.00000 |
| H | -0.77011 | -1.53228 | 0.00000 |

|   |          |          |          |
|---|----------|----------|----------|
| H | -1.76677 | -0.36310 | 0.87673  |
| H | -1.76677 | -0.36310 | -0.87673 |

Molecule 33

|   |         |          |          |
|---|---------|----------|----------|
| C | 0.00000 | 0.00000  | 0.66090  |
| C | 0.00000 | 0.00000  | -0.66090 |
| H | 0.00000 | 0.92183  | 1.22824  |
| H | 0.00000 | -0.92183 | -1.22824 |
| H | 0.00000 | -0.92183 | 1.22824  |
| H | 0.00000 | 0.92183  | -1.22824 |

Molecule 34

|   |          |          |          |
|---|----------|----------|----------|
| C | 0.60379  | 1.60245  | 0.66807  |
| C | 0.60379  | 0.37596  | 0.15674  |
| H | -0.32217 | 2.12157  | 0.88450  |
| H | 1.54777  | -0.11877 | -0.04952 |
| H | 1.52463  | 2.12494  | 0.88590  |
| C | -0.60379 | -0.37596 | -0.15674 |
| C | -0.60379 | -1.60245 | -0.66807 |
| H | 0.32217  | -2.12157 | -0.88450 |
| H | -1.54777 | 0.11877  | 0.04952  |
| H | -1.52463 | -2.12494 | -0.88590 |

Molecule 35

|   |          |          |          |
|---|----------|----------|----------|
| C | -1.71567 | -0.24833 | -0.29111 |
| C | -0.53741 | 0.52308  | 0.30313  |
| C | 0.71724  | -0.29274 | 0.33817  |
| H | -2.62461 | 0.35291  | -0.27637 |
| H | -1.90923 | -1.16188 | 0.27327  |

|   |          |          |          |
|---|----------|----------|----------|
| H | -1.51083 | -0.53228 | -1.32357 |
| H | -0.79174 | 0.82937  | 1.32181  |
| H | -0.36289 | 1.43751  | -0.26700 |
| C | 1.84812  | 0.01616  | -0.27677 |
| H | 2.71849  | -0.62335 | -0.21784 |
| H | 0.66468  | -1.21580 | 0.90992  |
| H | 1.94247  | 0.92445  | -0.86074 |

Molecule 36

|   |          |          |          |
|---|----------|----------|----------|
| C | 0.02891  | 1.16959  | 1.25903  |
| C | -0.31153 | 0.36972  | 0.00000  |
| C | 0.41202  | -0.94478 | -0.00000 |
| C | -0.16064 | -2.13793 | -0.00000 |
| C | 0.02891  | 1.16959  | -1.25903 |
| H | -0.24310 | 0.62031  | 2.16011  |
| H | 1.10001  | 1.37988  | 1.30304  |
| H | -0.49871 | 2.12439  | 1.26527  |
| H | 1.10001  | 1.37989  | -1.30303 |
| H | -0.24309 | 0.62032  | -2.16011 |
| H | -0.49871 | 2.12439  | -1.26526 |
| H | 0.42414  | -3.04790 | -0.00000 |
| H | 1.49818  | -0.87830 | 0.00000  |
| H | -1.23924 | -2.24543 | -0.00001 |
| H | -1.38553 | 0.16527  | -0.00000 |

Molecule 37

|   |          |          |          |
|---|----------|----------|----------|
| C | -0.03153 | 0.34994  | 0.00000  |
| C | -0.56566 | -1.06160 | 0.00000  |
| C | 0.12810  | -2.18904 | 0.00000  |
| C | -0.56566 | 1.06355  | -1.25047 |

|   |          |          |          |
|---|----------|----------|----------|
| C | -0.56566 | 1.06355  | 1.25047  |
| C | 1.49447  | 0.39823  | 0.00000  |
| H | -0.24621 | 2.10733  | -1.25958 |
| H | -0.19779 | 0.58415  | -2.15835 |
| H | -1.65663 | 1.04522  | -1.27638 |
| H | -0.24621 | 2.10733  | 1.25958  |
| H | -1.65663 | 1.04522  | 1.27638  |
| H | -0.19779 | 0.58415  | 2.15835  |
| H | 1.83508  | 1.43463  | 0.00000  |
| H | 1.90744  | -0.08975 | 0.88399  |
| H | 1.90744  | -0.08975 | -0.88399 |
| H | -0.37155 | -3.14835 | 0.00000  |
| H | -1.65172 | -1.12411 | 0.00000  |
| H | 1.21022  | -2.20392 | 0.00000  |

Molecule 38

|   |         |         |          |
|---|---------|---------|----------|
| C | 0.00000 | 0.00000 | 0.59694  |
| C | 0.00000 | 0.00000 | -0.59694 |
| H | 0.00000 | 0.00000 | 1.65944  |
| H | 0.00000 | 0.00000 | -1.65944 |

Molecule 39

|   |          |          |          |
|---|----------|----------|----------|
| C | 0.00000  | 0.00000  | 1.41525  |
| C | 0.00000  | 0.00000  | 0.21893  |
| H | 0.00000  | 0.00000  | 2.47703  |
| C | 0.00000  | 0.00000  | -1.23632 |
| H | 0.57395  | 0.84245  | -1.62140 |
| H | 0.44261  | -0.91828 | -1.62140 |
| H | -1.01656 | 0.07583  | -1.62140 |

Molecule 40

|   |          |          |          |
|---|----------|----------|----------|
| C | 0.00000  | 0.00000  | -1.17355 |
| C | 0.00000  | 0.00000  | 0.28095  |
| H | 0.17758  | 1.00737  | -1.54489 |
| H | 0.78362  | -0.65748 | -1.54489 |
| H | -0.96120 | -0.34990 | -1.54489 |
| N | 0.00000  | 0.00000  | 1.42718  |

Molecule 41

|   |          |          |         |
|---|----------|----------|---------|
| C | 0.37680  | -1.64611 | 0.00000 |
| C | -0.49231 | -0.64107 | 0.00000 |
| H | 1.44364  | -1.47013 | 0.00000 |
| H | -1.55679 | -0.84425 | 0.00000 |
| H | 0.03479  | -2.67131 | 0.00000 |
| C | -0.11702 | 0.73379  | 0.00000 |
| C | 0.17285  | 1.89675  | 0.00000 |
| H | 0.43647  | 2.92553  | 0.00000 |

Molecule 42

|   |          |          |         |
|---|----------|----------|---------|
| C | 1.17853  | -1.13099 | 0.00000 |
| C | -0.09741 | -0.76885 | 0.00000 |
| H | 1.97517  | -0.40045 | 0.00000 |
| H | -0.89449 | -1.50016 | 0.00000 |
| H | 1.45159  | -2.17636 | 0.00000 |
| C | -0.50687 | 0.60097  | 0.00000 |
| N | -0.85397 | 1.69574  | 0.00000 |

Molecule 43

|   |         |         |         |
|---|---------|---------|---------|
| C | 0.00000 | 0.00000 | 1.88501 |
|---|---------|---------|---------|

|   |         |         |          |
|---|---------|---------|----------|
| C | 0.00000 | 0.00000 | 0.68601  |
| H | 0.00000 | 0.00000 | 2.94728  |
| C | 0.00000 | 0.00000 | -0.68601 |
| C | 0.00000 | 0.00000 | -1.88501 |
| H | 0.00000 | 0.00000 | -2.94728 |

Molecule 44

|   |         |         |          |
|---|---------|---------|----------|
| C | 0.00000 | 0.00000 | -1.83029 |
| C | 0.00000 | 0.00000 | -0.63431 |
| H | 0.00000 | 0.00000 | -2.89363 |
| C | 0.00000 | 0.00000 | 0.74097  |
| N | 0.00000 | 0.00000 | 1.89077  |

Molecule 45

|   |          |          |          |
|---|----------|----------|----------|
| C | -0.00426 | -0.90722 | 0.00000  |
| C | -0.00741 | -0.19332 | 1.19420  |
| C | -0.00741 | -0.19332 | -1.19420 |
| C | -0.00741 | 1.19293  | 1.19717  |
| C | -0.00741 | 1.19293  | -1.19717 |
| C | -0.00619 | 1.89210  | 0.00000  |
| C | 0.02800  | -2.41053 | 0.00000  |
| H | -0.01198 | -0.73075 | 2.13455  |
| H | -0.01198 | -0.73075 | -2.13455 |
| H | -0.01136 | 1.72824  | 2.13722  |
| H | -0.01136 | 1.72824  | -2.13722 |
| H | -0.00908 | 2.97345  | 0.00000  |
| H | 1.05719  | -2.77508 | 0.00000  |
| H | -0.46441 | -2.81731 | 0.88256  |
| H | -0.46441 | -2.81731 | -0.88256 |



Molecule 46

|   |          |          |          |
|---|----------|----------|----------|
| C | -0.43305 | -0.00005 | -0.33327 |
| C | 0.26505  | -1.19449 | -0.18767 |
| C | 0.26498  | 1.19444  | -0.18774 |
| C | 1.62209  | -1.19768 | 0.09528  |
| C | 1.62201  | 1.19774  | 0.09521  |
| C | 2.30572  | 0.00005  | 0.23841  |
| C | -1.91655 | -0.00010 | -0.59133 |
| H | -0.26169 | -2.13441 | -0.30114 |
| H | -0.26183 | 2.13432  | -0.30126 |
| H | 2.14760  | -2.13733 | 0.20097  |
| H | 2.14746  | 2.13743  | 0.20085  |
| H | 3.36492  | 0.00009  | 0.45641  |
| H | -2.18255 | 0.87570  | -1.18588 |
| H | -2.18253 | -0.87607 | -1.18564 |
| C | -2.72741 | 0.00007  | 0.70541  |
| H | -2.49535 | 0.88057  | 1.30546  |
| H | -3.79781 | 0.00004  | 0.49871  |
| H | -2.49533 | -0.88025 | 1.30570  |

Molecule 47

|   |          |         |          |
|---|----------|---------|----------|
| C | -0.67552 | 1.54813 | 0.00000  |
| H | -1.76818 | 1.53806 | 0.00000  |
| C | -0.21823 | 2.28396 | 1.26094  |
| C | -0.21823 | 2.28396 | -1.26094 |
| H | -0.60737 | 3.30301 | 1.27281  |
| H | -0.56263 | 1.77380 | 2.16036  |
| H | 0.87070  | 2.34291 | 1.30576  |
| H | -0.60737 | 3.30301 | -1.27281 |
| H | 0.87070  | 2.34291 | -1.30576 |

|   |          |          |          |
|---|----------|----------|----------|
| H | -0.56263 | 1.77380  | -2.16036 |
| C | -0.21823 | 0.10491  | 0.00000  |
| C | -1.14213 | -0.93330 | 0.00000  |
| C | 1.13606  | -0.22136 | 0.00000  |
| C | -0.73206 | -2.25900 | 0.00000  |
| C | 1.55183  | -1.54224 | 0.00000  |
| C | 0.61781  | -2.56838 | 0.00000  |
| H | -2.20024 | -0.70137 | 0.00000  |
| H | 1.87882  | 0.56666  | 0.00000  |
| H | -1.47013 | -3.04991 | 0.00000  |
| H | 2.60884  | -1.77272 | 0.00000  |
| H | 0.94163  | -3.60017 | 0.00000  |

Molecule 48

|   |          |          |          |
|---|----------|----------|----------|
| C | 0.51664  | -1.35804 | 0.00000  |
| C | 0.00234  | -2.08175 | 1.25397  |
| C | 0.00234  | -2.08175 | -1.25397 |
| C | 2.04497  | -1.43125 | 0.00000  |
| H | -1.08662 | -2.10882 | 1.28617  |
| H | 0.36297  | -3.11192 | 1.26906  |
| H | 0.35251  | -1.58332 | 2.15871  |
| H | 0.35251  | -1.58332 | -2.15871 |
| H | 0.36297  | -3.11192 | -1.26906 |
| H | -1.08662 | -2.10882 | -1.28617 |
| H | 2.47249  | -0.95802 | 0.88491  |
| H | 2.35856  | -2.47582 | 0.00000  |
| H | 2.47249  | -0.95802 | -0.88491 |
| C | 0.00234  | 0.08296  | 0.00000  |
| C | 0.84763  | 1.18737  | 0.00000  |
| C | -1.37230 | 0.32659  | 0.00000  |
| C | 0.34406  | 2.48204  | 0.00000  |

|   |          |          |         |
|---|----------|----------|---------|
| C | -1.88007 | 1.61332  | 0.00000 |
| C | -1.02108 | 2.70284  | 0.00000 |
| H | 1.91933  | 1.05387  | 0.00000 |
| H | -2.06573 | -0.50417 | 0.00000 |
| H | 1.02906  | 3.31946  | 0.00000 |
| H | -2.95101 | 1.76658  | 0.00000 |
| H | -1.41410 | 3.71026  | 0.00000 |

Molecule 49

|   |          |          |          |
|---|----------|----------|----------|
| C | 1.57678  | 0.62265  | -0.00001 |
| C | 2.58333  | -0.21342 | -0.74704 |
| C | 2.58331  | -0.21336 | 0.74709  |
| H | 1.76792  | 1.68741  | -0.00005 |
| H | 3.38142  | 0.30175  | -1.26145 |
| H | 2.21207  | -1.09153 | -1.25674 |
| H | 3.38139  | 0.30184  | 1.26147  |
| H | 2.21205  | -1.09144 | 1.25685  |
| C | 0.13231  | 0.27590  | -0.00001 |
| C | -0.31854 | -1.04306 | 0.00003  |
| C | -0.81804 | 1.29270  | -0.00005 |
| C | -1.67251 | -1.33274 | 0.00003  |
| C | -2.17449 | 1.00616  | -0.00004 |
| C | -2.60882 | -0.30928 | -0.00000 |
| H | 0.39233  | -1.86005 | 0.00005  |
| H | -0.48953 | 2.32456  | -0.00007 |
| H | -1.99854 | -2.36426 | 0.00006  |
| H | -2.89302 | 1.81484  | -0.00007 |
| H | -3.66595 | -0.53641 | -0.00000 |

Molecule 50

|   |          |          |          |
|---|----------|----------|----------|
| C | 0.50925  | -0.21984 | -0.04251 |
| C | -0.40179 | -1.27354 | 0.00193  |
| C | 0.00919  | 1.08301  | -0.05974 |
| C | -1.76709 | -1.03956 | 0.04330  |
| C | -1.35271 | 1.31942  | -0.01925 |
| C | -2.24789 | 0.25932  | 0.03488  |
| C | 1.94858  | -0.52290 | -0.07061 |
| H | -0.03211 | -2.29137 | 0.00859  |
| H | 0.68947  | 1.92183  | -0.11703 |
| H | -2.45491 | -1.87334 | 0.08063  |
| H | -1.72043 | 2.33650  | -0.03577 |
| H | -3.31237 | 0.44721  | 0.06438  |
| C | 2.94854  | 0.33415  | 0.09459  |
| H | 2.19025  | -1.56854 | -0.23241 |
| H | 2.78832  | 1.38819  | 0.28076  |
| H | 3.97533  | -0.00089 | 0.05533  |

Molecule 51

|   |         |          |          |
|---|---------|----------|----------|
| C | 0.00000 | 0.00000  | 0.58538  |
| C | 0.00000 | 1.20427  | -0.11928 |
| C | 0.00000 | -1.20427 | -0.11928 |
| C | 0.00000 | 1.20047  | -1.50316 |
| C | 0.00000 | -1.20047 | -1.50316 |
| C | 0.00000 | 0.00000  | -2.19803 |
| C | 0.00000 | 0.00000  | 2.01571  |
| H | 0.00000 | 2.13685  | 0.42706  |
| H | 0.00000 | -2.13685 | 0.42706  |
| H | 0.00000 | 2.13829  | -2.04135 |
| H | 0.00000 | -2.13829 | -2.04135 |
| H | 0.00000 | 0.00000  | -3.27934 |
| C | 0.00000 | 0.00000  | 3.21383  |

|   |         |         |         |
|---|---------|---------|---------|
| H | 0.00000 | 0.00000 | 4.27586 |
|---|---------|---------|---------|

Molecule 52

|   |         |          |          |
|---|---------|----------|----------|
| C | 0.00000 | 0.00000  | 0.60245  |
| C | 0.00000 | 1.20857  | -0.09040 |
| C | 0.00000 | -1.20857 | -0.09040 |
| C | 0.00000 | 1.20268  | -1.47387 |
| C | 0.00000 | -1.20268 | -1.47387 |
| C | 0.00000 | 0.00000  | -2.16513 |
| C | 0.00000 | 0.00000  | 2.03589  |
| H | 0.00000 | 2.13957  | 0.45798  |
| H | 0.00000 | -2.13957 | 0.45798  |
| H | 0.00000 | 2.13900  | -2.01371 |
| H | 0.00000 | -2.13900 | -2.01371 |
| H | 0.00000 | 0.00000  | -3.24634 |
| N | 0.00000 | 0.00000  | 3.18426  |

Molecule 53

|   |          |          |          |
|---|----------|----------|----------|
| C | 0.00000  | 0.00000  | 0.74077  |
| C | -0.42330 | 1.11958  | 1.45444  |
| C | 0.42330  | -1.11958 | 1.45444  |
| C | -0.42352 | 1.12031  | 2.83963  |
| C | 0.42352  | -1.12031 | 2.83963  |
| C | 0.00000  | 0.00000  | 3.53795  |
| H | -0.77583 | 1.99072  | 0.91809  |
| H | 0.77583  | -1.99072 | 0.91809  |
| H | -0.76306 | 1.99652  | 3.37523  |
| H | 0.76306  | -1.99652 | 3.37523  |
| H | 0.00000  | 0.00000  | 4.61929  |
| C | 0.00000  | 0.00000  | -0.74077 |

|   |          |          |          |
|---|----------|----------|----------|
| C | -0.42330 | -1.11958 | -1.45444 |
| C | 0.42330  | 1.11958  | -1.45444 |
| C | -0.42352 | -1.12031 | -2.83963 |
| C | 0.42352  | 1.12031  | -2.83963 |
| C | 0.00000  | 0.00000  | -3.53795 |
| H | -0.77583 | -1.99072 | -0.91809 |
| H | 0.77583  | 1.99072  | -0.91809 |
| H | -0.76306 | -1.99652 | -3.37523 |
| H | 0.76306  | 1.99652  | -3.37523 |
| H | 0.00000  | 0.00000  | -4.61929 |

## REFERENCES

- <sup>1</sup>C. Costain, "Determination of Molecular Structures from Ground State Rotational Constants," *J. Chem. Phys.* **29**, 864–874 (1958).
- <sup>2</sup>R. Hilderbrandt and J. Wieser, "The Zero Point Average Structure of Isobutane as Determined by Electron Diffraction and Microwave Spectroscopy," *J. Mol. Struct.* **15**, 27–36 (1973).
- <sup>3</sup>D. Lide, "Structure of the Isobutane Molecule; Change of Dipole Moment on Isotopic Substitution," *J. Chem. Phys.* **33**, 1519–1522 (1960).
- <sup>4</sup>D. VanHemelrijk, L. Van den Enden, H. Geise, H. Sellers, and Schäfer, "Structure Determination of 1-Butene by Gas Electron Diffraction, Microwave Spectroscopy, Molecular Mechanics, and Molecular Orbital Constrained Electron Diffraction," *J. Amer. Chem. Soc.* **102**, 2189–2195 (1980).
- <sup>5</sup>C. Bock and Y. Panchenko, "An Ab Initio Structural Investigation of 1,3-Butadiene, Isoprene and 2,3-Dimethyl-1,3-butadiene Rotamers," *J. Mol. Struct.: THEOCHEM* **187**, 69–82 (1989).
- <sup>6</sup>A. Kraśnicki, K. Zbigniew, B. Drouin, and J. Pearson, "Terahertz Spectroscopy of isotopic Acrylonitrile," *J. Mol. Spectrosc.* **1006**, 20–27 (2011).
- <sup>7</sup>J. Colmont, G. Wlodarczak, D. Priem, H. Müller, E. Tien, R. Richards, and M. Gerry, "Rotational Spectra of Selected Isotopic Species of Vinyl Cyanide: Molecular Structure and Quadrupole Hyperfine Structure," *J. Mol. Spectrosc.* **181**, 330–344 (1997).

- <sup>8</sup>L. Kang and S. Novick, "The Microwave Spectra of the Weakly Bound Complex Between Carbon Monoxide and Cyanoacetylene, OC H-C≡C-C≡N," *J. Mol. Spectrosc.* **276-277**, 10–13 (2012).
- <sup>9</sup>K. Matsumura, R. Suenram, F. Lovas, and T. Tanaka, "Fourier Transform Microwave Spectroscopy of Isotopically Substituted Diacetylenes:  $r_s$ -Structure, Quadrupole Coupling, and Anisotropic Nuclear Spin-Spin Interaction," *J. Mol. Spectrosc.* **240**, 120–126 (2006).
- <sup>10</sup>G. Guirgis, C. Zheng, T. Gounev, and J. Durig, "Conformational Stability, Ab Initio Calculations, and  $r_o$  structural Parameters of 3-Methyl-1-butene and Dimethylvinylsilane," *J. Mol. Struct.* **651-653**, 771–780 (2003).
- <sup>11</sup>A. Narten, "X-Ray Diffraction Study of Liquid Neopentane in the Temperature Range -17 to 150°C," *J. Chem. Phys.* **70**, 299–304 (1979).
- <sup>12</sup>M. Sugie, M. Kato, C. Matsumura, and H. Takeo, "Microwave Spectra and Molecular Structures of 1,2-Dichloroethane, 1,1-Dichloroethane and 1,1,1-Trichloroethane," *J. Mol. Struct.* **413-414**, 487–494 (1997).
- <sup>13</sup>A. Almenningen, B. Andersen, and Trøetteberg, "An Electron Diffraction Investigation of the Molecular Structure of Hexachloroethane in the Vapour Phase," *Acta Chem. Scand.* **18**, 603–611 (1964).
- <sup>14</sup>R. Livingston and C. Ramachandra Rao, "The Molecular Structure of Pivalonitrile Electron Diffraction," *J. Am. Chem. Soc.* **81**, 3584–3586 (1958).
- <sup>15</sup>T. Iijima, "An Electron-Diffraction Investigation of the Molecular Structure of Toluene," *Z. Naturforsch.* **32a**, 1063–1064 (1977).
- <sup>16</sup>F. Keidel and S. Bauer, "Structures of Toluene, Phenylsilane, and Diphenyldichlorosilane," *J. Chem. Phys.* **25**, 1218–1227 (1956).
- <sup>17</sup>P. Scharfenberg, B. Rozsondai, and I. Hargittai, "Conformation and Structure of Ethylbenzene in the Vapour Phase," *Z. Naturforsch.* **35a**, 431–436 (1980).
- <sup>18</sup>J. Cochran, K. Hagen, G. Paulen, Q. Shen, S. Tom, M. Trøetteberg, and C. Wells, "On the Planarity of Styrene and its Derivatives: The Molecular Structures of Styrene and (Z)- $\beta$ -Bromostyrene as Determined by Ab Initio Calculations and Gas-Phase Electron Diffraction," *J. Mol. Spectrosc.* **413-414**, 313–326 (1997).
- <sup>19</sup>H. Rudolph, J. Demaison, and A. Császár, "Accurate Determination of the Deformation of the Benzene Ring Upon Substitution: Equilibrium Structures of Benzonitrile and Phenylacetylene," *J. Chem. Phys. A* **117**, 12969–12982 (2013).

- <sup>20</sup>J. Casado, L. Nygaard, and G. Srensen, "Microwave Spectra of Isotopic Benzonitriles. Refined Molecular Structure of Benzonitrile," *J. Mol. Struct.* **8**, 211–224 (1970).
- <sup>21</sup>L. Vilkov, N. Sadova, and S. Mochalov, "The Structure of Cumene and Phenylcyclobutane Molecules, as Studied by Means of Electron Diffraction Patterns," *Dokl. Akad. Nauk SSSR* **179**, 896–899 (1968).
- <sup>22</sup>Q. Shen, C. Wells, M. Trætterberg, R. Bohn, A. Willis, and J. Knee, "Molecular Structure and Conformation of Cyclopropylbenzene as Determined by Ab Initio Molecular Orbital Calculations, Pulsed Jet Fourier Transform Microwave Spectroscopic, and Gas-Phase Electron Diffraction Investigations," *J. Org. Chem.* **66**, 5840–5845 (2001).
- <sup>23</sup>A. Campanelli, F. Ramondo, A. Domenicano, and I. Hargittai, "Molecular Structure and Conformation of *tert*-Butylbenzene: A Concerted Study by Gas-Phase Electron Diffraction and Theoretical Calculations," *J. Phys. Chem.* **98**, 11046–11052 (1994).
- <sup>24</sup>I. Karle and L. Brockway, "The Structures of Biphenyl, *o*-Terphenyl and Tetraphenylene," *J. Am. Chem. Soc.* **66**, 1974–1979 (1942).
- <sup>25</sup>Q. Shen, "The Molecular Structure of 1,2-Diphenylethane as Determined by Gas-Phase Electron Diffraction," *J. Mol. Struct.* **471**, 57–61 (1998).
- <sup>26</sup>M. Flamm-ter, H.-D. Beckhaus, K. Peters, H.-G. von Schnering, and C. Rüchardt, "2,3-Di-1-adamantyl-2,3-dimethylbutane; Long Bonds and Low Thermal Stability," *Chem. Ber.* **113**, 4665–4671 (1985).
- <sup>27</sup>G. Kratt, H.-D. Beckhaus, H. Lindner, and C. Rüchardt, "Thermolabile Kohlenwasserstoffe, XX. Synthese, Struktur und Spannung Symmetrischer Tetraalkyldiarylethane," *Chem. Ber.* **116**, 3235–3263 (1983).
- <sup>28</sup>D. Dougherty, C. Choi, G. Kaupp, A. Buda, J. Rudziński, and E. Osawa, "Effects of Substituents on the Length of Central C(sp<sup>3</sup>)-C(sp<sup>3</sup>) Bond in Anthracene Photodimers and Related Molecules," *J. Chem. Soc. Perkin Trans. 2* **7**, 1063–1070 (1986).
- <sup>29</sup>B. Slepetz and M. Kertesz, "Volume Change During Thermal [4+4] Cycloaddition of [2.2](9,10)Anthracenophane," *J. Am. Chem. Soc.* **135**, 13720–13727 (2013).
- <sup>30</sup>E. Ehrenburg, "The Crystal Structure of Bi(anthracene-9,10-dimethylene) Photo-Isomer," *Acta Cryst.* **20**, 183–186 (1965).
- <sup>31</sup>T. Takeda, H. Kawai, R. Herges, E. Mucke, Y. Sawai, K. Murakoshi, K. Fujiwara, and T. Suzuki, "Negligible Diradical Character for the Ultralong C–C Bond in 1,1,2,2-Tetraarylpyracene Derivatives at Room Temperature," *Tetrahedron Lett.* **59**, 3693–3697 (2009).



- <sup>32</sup>K. Gunnelin, P. Glans, J.-E. Rubensson, C. S athe, J. Nordgren, Y. Li, F. Gelm ukhanov, and H.  gren, "Bond-Length-Dependent Core Hole Localization Observed in Simple Hydrocarbons," *Phys. Rev. Lett.* **83**, 1315–1318 (1999).
- <sup>33</sup>V. Amir-Ebrahimi and A. Choplin, "Microwave Spectrum of the <sup>13</sup>C-Ring-Monosubstituted Toluenes and Structure of Toluene," *J. Mol. Spectrosc.* **89**, 42–52 (1982).
- <sup>34</sup>H. Okabe and V. Dibeler, "Photon Impact Studies of Cyanoacetylene and Acetonitrile in the Vacuum Ultraviolet. Heats of Formation of Ethynyl and Acetonitrile," *J. Chem. Phys.* **59**, 2430–2435 (1973).
- <sup>35</sup>M. W. Chase and Jr., "Nist-janaf thermochemical tables, fourth edition," *J. Phys. Chem. Ref. Data Monograph* **9**, 1–1951 (1998).
- <sup>36</sup>J. Cioslowski, G. Liu, and D. Moncrieff, "Thermochemistry of Homolytic C–C, C–H, and C–Cl Bond Dissociations in Polychloroethanes: Benchmark Electronic Structure Calculations," *J. Am. Chem. Soc.* **119**, 11452–11457 (1997).
- <sup>37</sup>R. Winiker, H.-D. Beckhaus, and C. R uchardt, "Thermische Stabilit t, Spannungsenthalpie und Struktur Symmetrisch Hexaalkylierter Ethane," *Chem. Ber.* **113**, 3456–3476 (1980).
- <sup>38</sup>J. Martin, M. Fernandez, and J. Tortajada, "Application of Wiberg Indices to Geometry Optimization. C–C Distances," *J. Mol. Struct.* **175**, 203–208 (1988).
- <sup>39</sup>L. Bartell and T. Boates, "Structure of the Strained Molecules Hexamethylethane and 1,1,2,2-Tetramethylethane by Gas-Phase Electron Diffraction," *J. Mol. Struct.* **32**, 379–392 (1976).
- <sup>40</sup>P. R. Schreiner, L. V. Chernish, P. A. Gunchenko, E. Y. Tikhonchuk, H. Hausmann, M. Serafin, S. Schlecht, J. E. P. Dahl, R. M. K. Carlson, and A. A. Fokin, "Overcoming Lability of Extremely Long Alkane Carbon-Carbon Bonds Through Dispersion Forces," *Nature* **477**, 308–311 (2011).
- <sup>41</sup>S. Grimme and P. R. Schreiner, "Steric Crowding Can Stabilize a Labile Molecule: Solving the Hexaphenylethane Riddle," *Angew. Chem. Int. Ed.* **50**, 12639–12642 (2011).
- <sup>42</sup>B. Kahr, D. Van Engen, and K. Mislow, "Length of the Ethane Bond in Hexaphenylethane and its Derivatives," *J. A. Chem. Soc.* **108**, 8305–8307 (1986).
- <sup>43</sup>Z. Szabo and I. Thege, "Some Empirical Correlations on Chemical Bonds," *Acta Chem. Acad. Sci. Hung.* **86**, 127–145 (1975).
- <sup>44</sup>Y.-R. Luo, *Comprehensive Handbook of Chemical Bond Energies* (Taylor and Francis Group, New York, 2007).
- <sup>45</sup>in *NIST Computational Chemistry Comparison and Benchmark Database, NIST Standard Ref-*

- erence Database Number 101, Release 15b, edited by R. Johnson III (<http://cccbdb.nist.gov/>, 2011).
- <sup>46</sup>H. Afeefy, J. Liebman, and S. Stein, in *NIST Computational Chemistry Comparison and Benchmark Database, NIST Standard Reference Database Number 69* (<http://webbook.nist.gov/>, 2001).
- <sup>47</sup>D. R. Lide, *CRC Handbook of Chemistry and Physics, 74th ed.* (CRC, Boca Raton, FL, 1993).
- <sup>48</sup>A. A. Zavitsas, "The Relation between Bond Lengths and Dissociation Energies of Carbon-Carbon Bonds," *J. Phys. Chem. A* **107**, 897–898 (2003).
- <sup>49</sup>D. Griller, J. Kanabus-Kaminska, and A. Maccoll, "Bond Dissociation Energies for Common Organic Compounds," *J. Mol. Struct.: THEOCHEM* **40**, 125–131 (1988).
- <sup>50</sup>M. P. Johansson and M. Swart, "Intramolecular halogen–halogen bonds?" *Phys. Chem. Chem. Phys.* **15**, 11543–11553 (2013).
